# Supplementary material
Source: PubMed Central journal article supplement (PMC4078945)

## SUPPORTING INFORMATION

### Development and Bioorthogonal Activation of Palladium-Labile Prodrugs of Gemcitabine

J. T. Weiss,<sup>a</sup> J. C. Dawson,<sup>a</sup> C. Fraser,<sup>a</sup> W. Rybski,<sup>a,b</sup> C. Torres-Sánchez,<sup>c</sup> E. E. Patton,<sup>a,b</sup> N. O. Carragher<sup>a</sup> and A. Unciti-Broceta<sup>a,\*</sup>

<sup>a</sup> Edinburgh Cancer Research UK Centre, MRC Institute of Genetics and Molecular Medicine, University of Edinburgh, Crewe Road South, Edinburgh EH4 2XR, UK.

<sup>b</sup> MRC Human Genetics Unit, MRC Institute of Genetics and Molecular Medicine, University of Edinburgh, Crewe Road South, Edinburgh EH4 2XR, UK.

<sup>c</sup> Wolfson School of Mechanical and Manufacturing Engineering, Loughborough University, Loughborough LE11 3TU, UK.

#### LIST OF CONTENTS:

|                                                    |                    |
|----------------------------------------------------|--------------------|
| <b>1. NMR spectra of carbonate prodrugs 2a,p,b</b> | <b>Pages 2-7</b>   |
| Compound 2a                                        | Page 2             |
| Compound 2p                                        | Page 4             |
| Compound 2b                                        | Page 6             |
| <b>1. NMR spectra of carbamate prodrugs 5a,p,b</b> | <b>Pages 8-13</b>  |
| Compound 5a                                        | Page 8             |
| Compound 5p                                        | Page 10            |
| Compound 5b                                        | Page 12            |
| <b>1. NMR spectra of carbamate prodrugs 8a,p,b</b> | <b>Pages 14-19</b> |
| Compound 8a                                        | Page 14            |
| Compound 8p                                        | Page 16            |
| Compound 8b                                        | Page 18            |

<sup>1</sup>H NMR (500 MHz, d-DMSO) of compound 2a

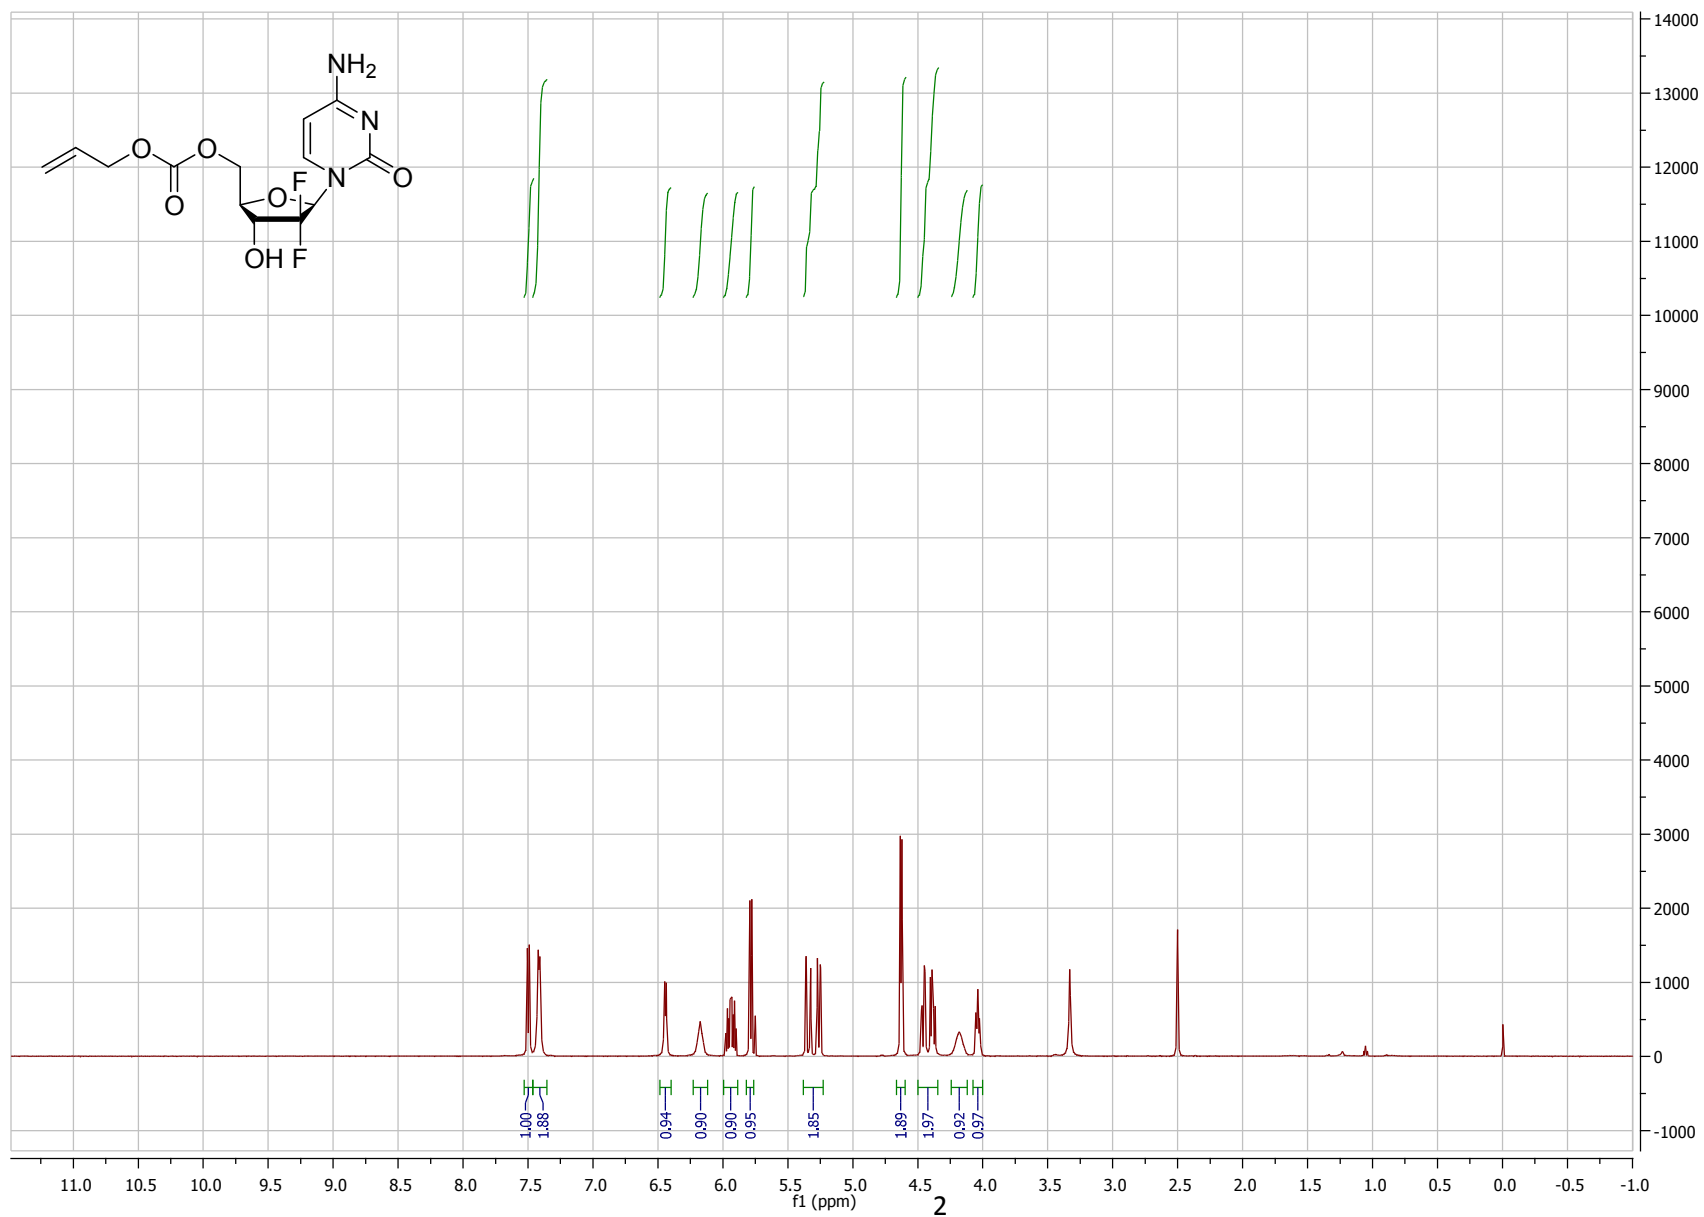

<sup>13</sup>C NMR (126 MHz, d-DMSO) of compound **2a**

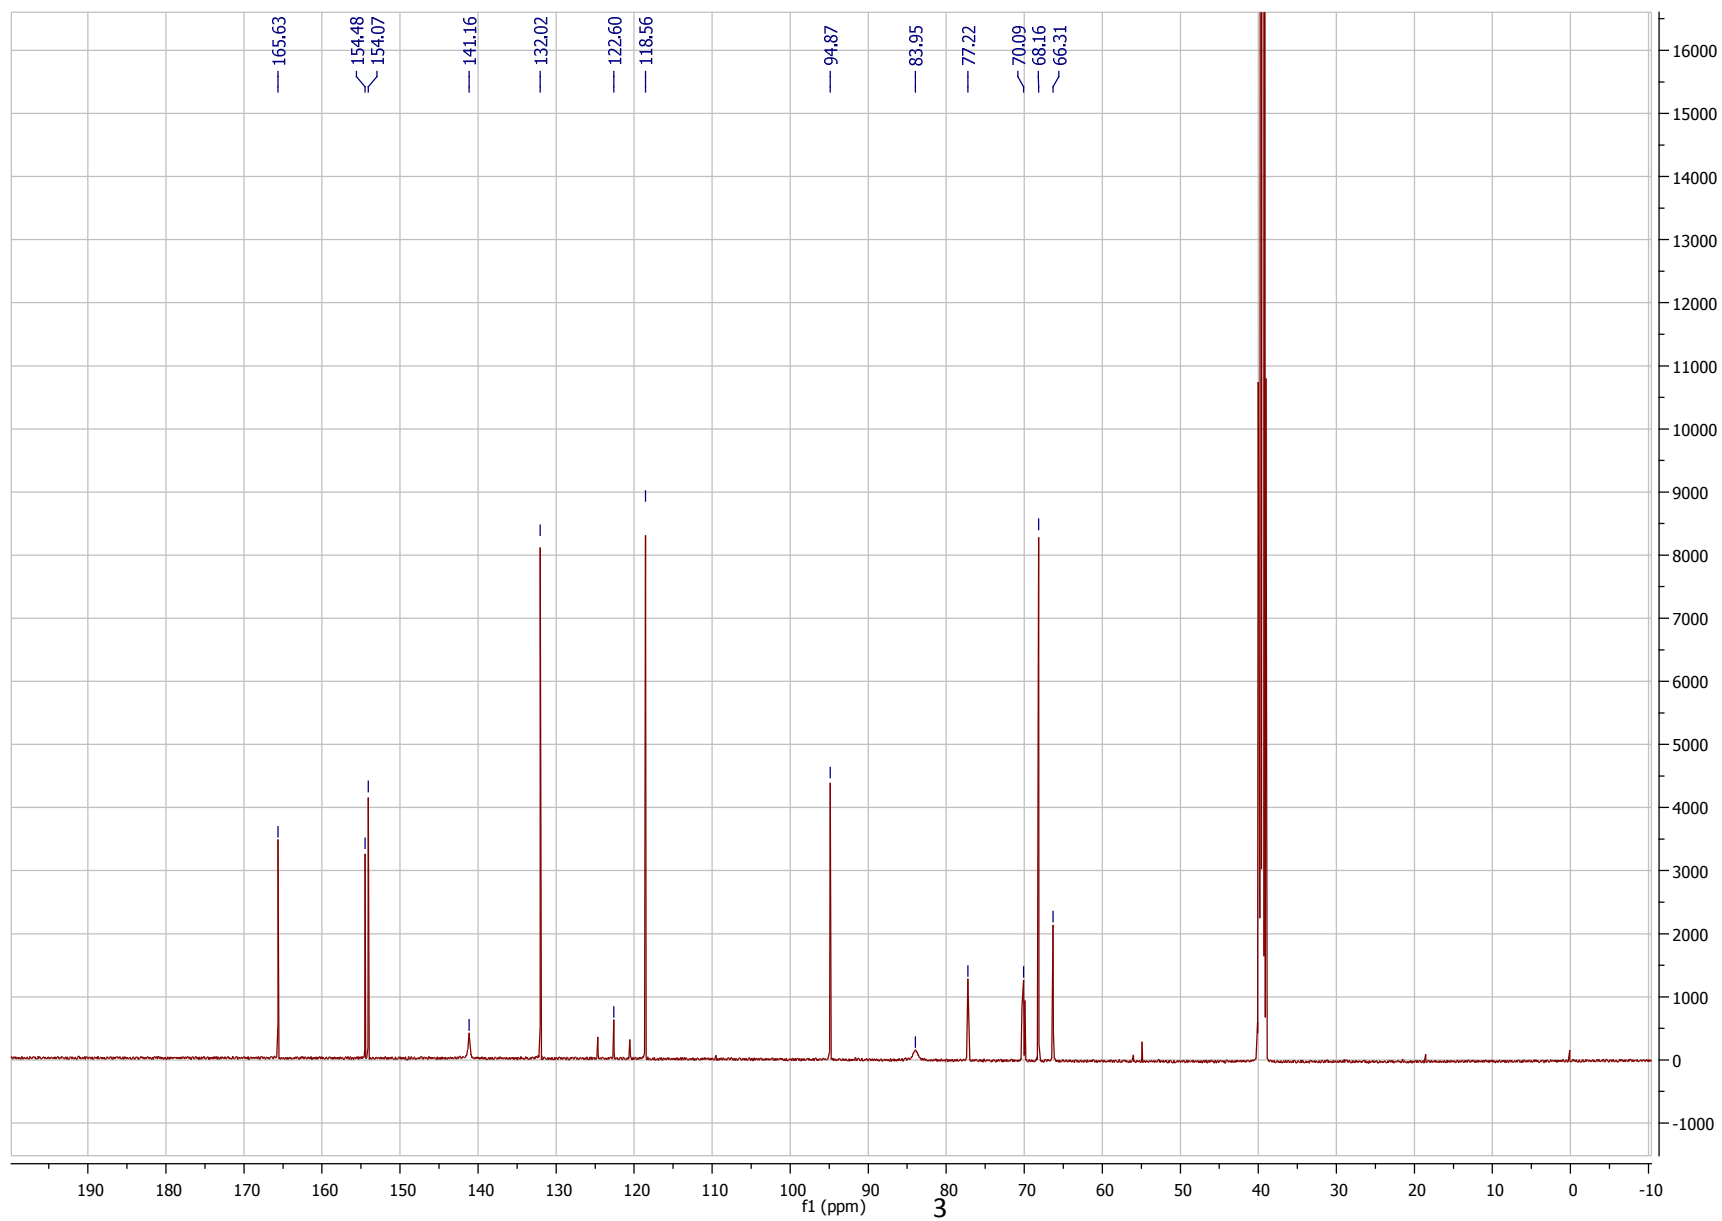

<sup>1</sup>H NMR (500 MHz, d-DMSO) of compound **2p**

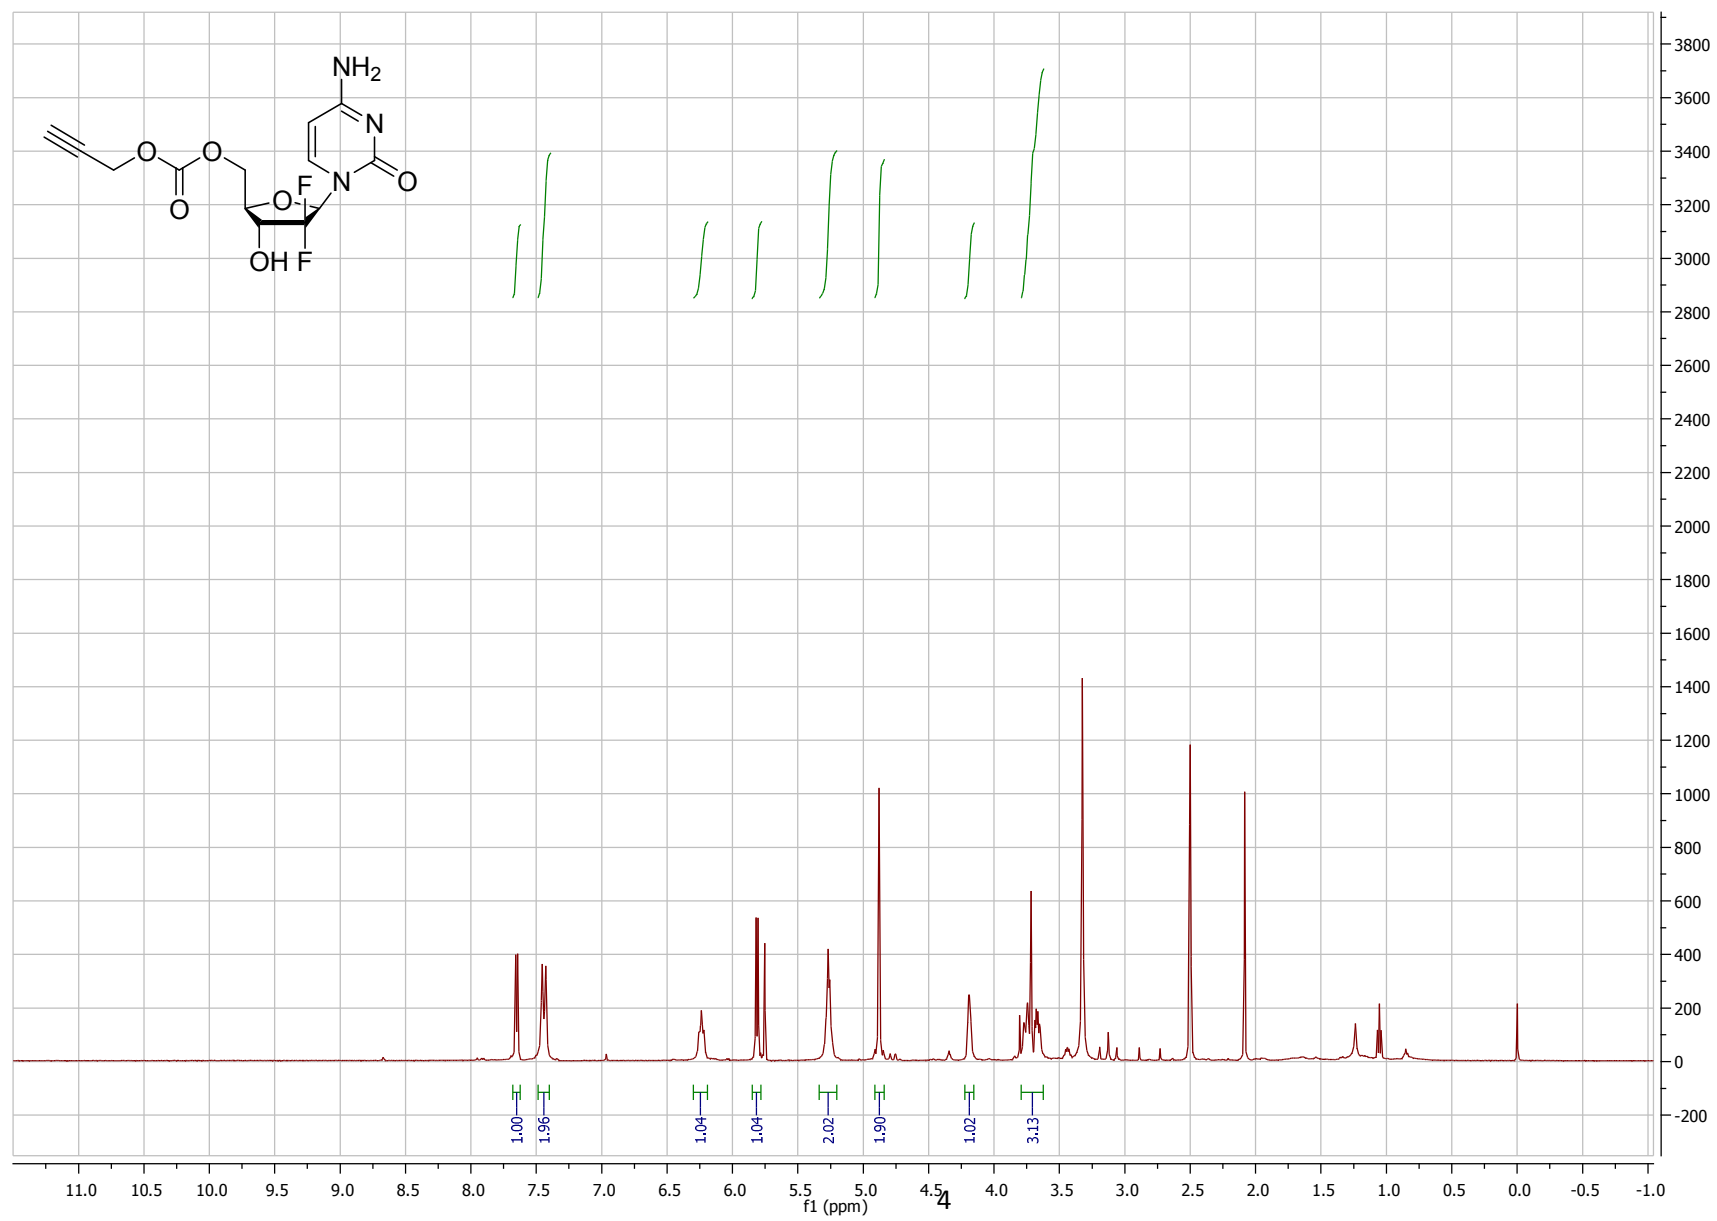

<sup>13</sup>C NMR (126 MHz, d-DMSO) of compound **2p**

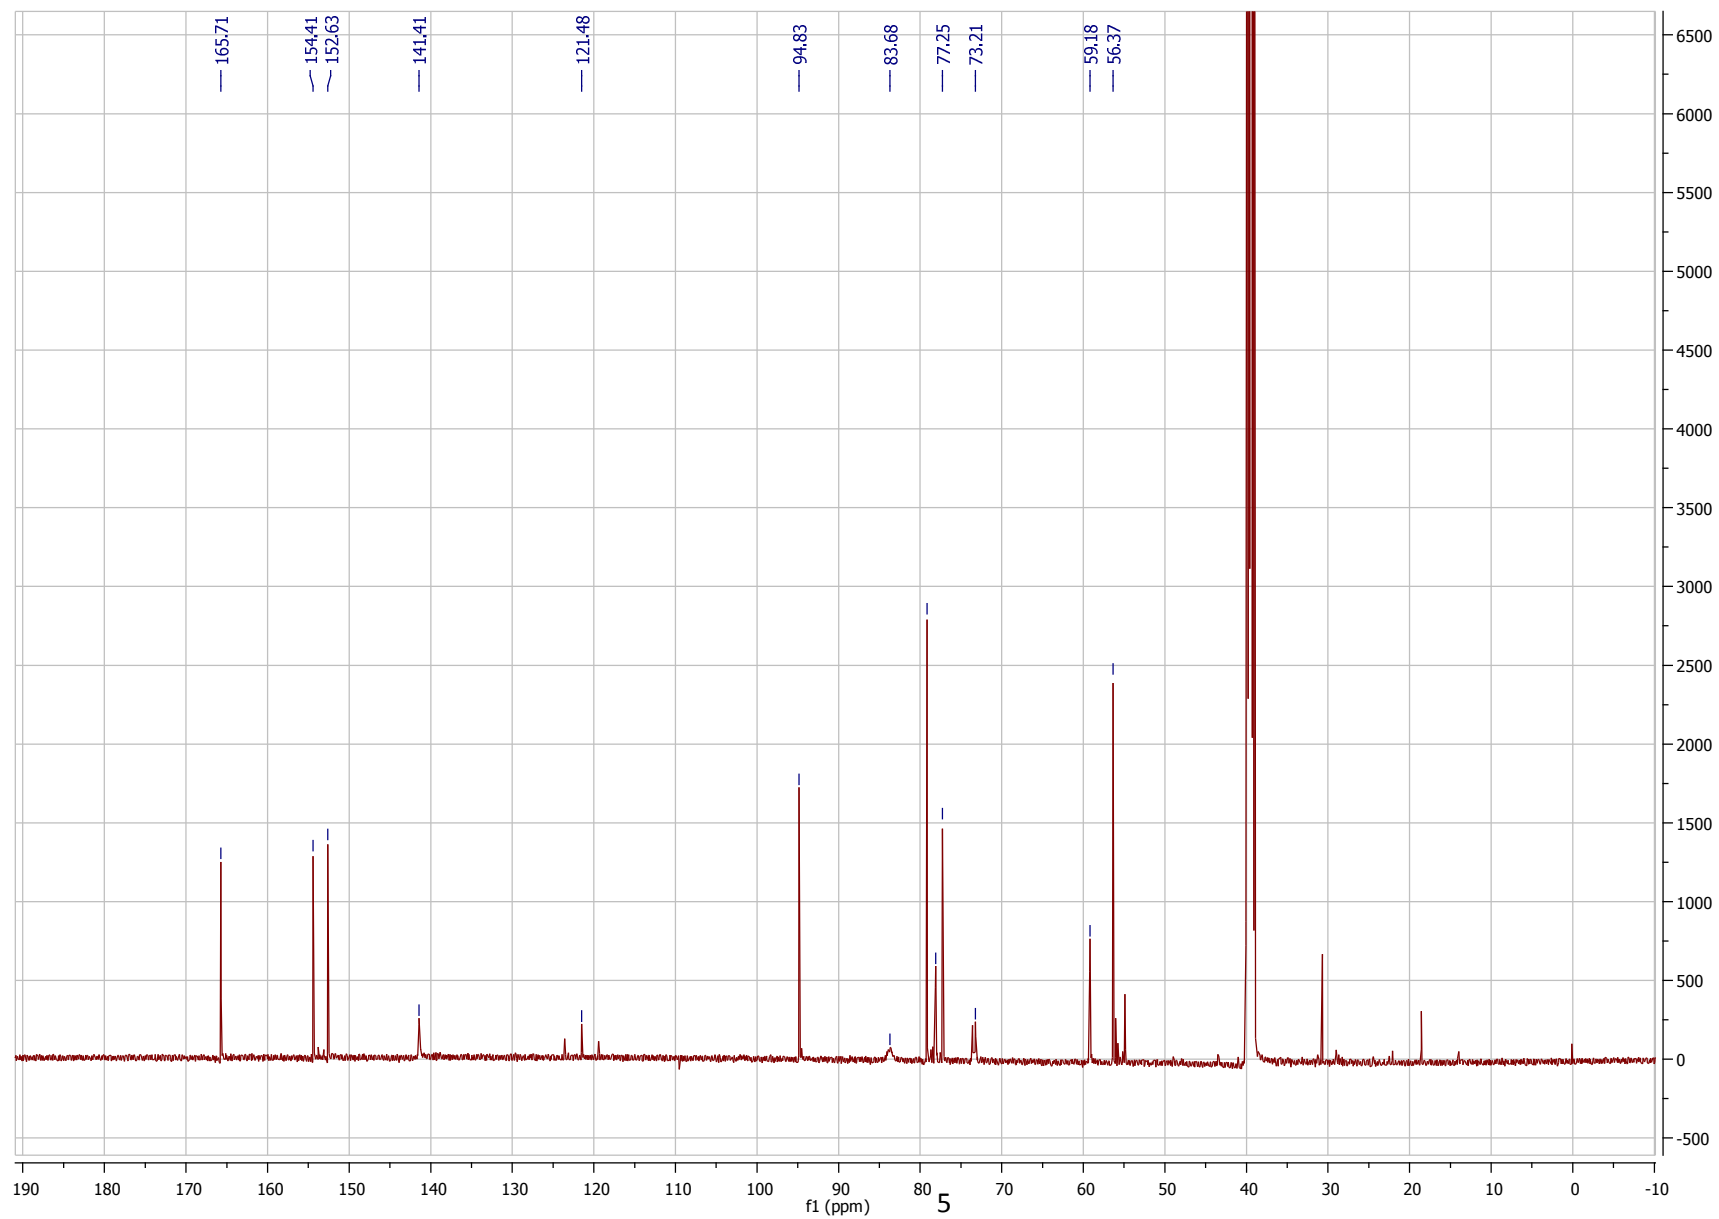

<sup>1</sup>H NMR (500 MHz, d-DMSO) of compound **2b**

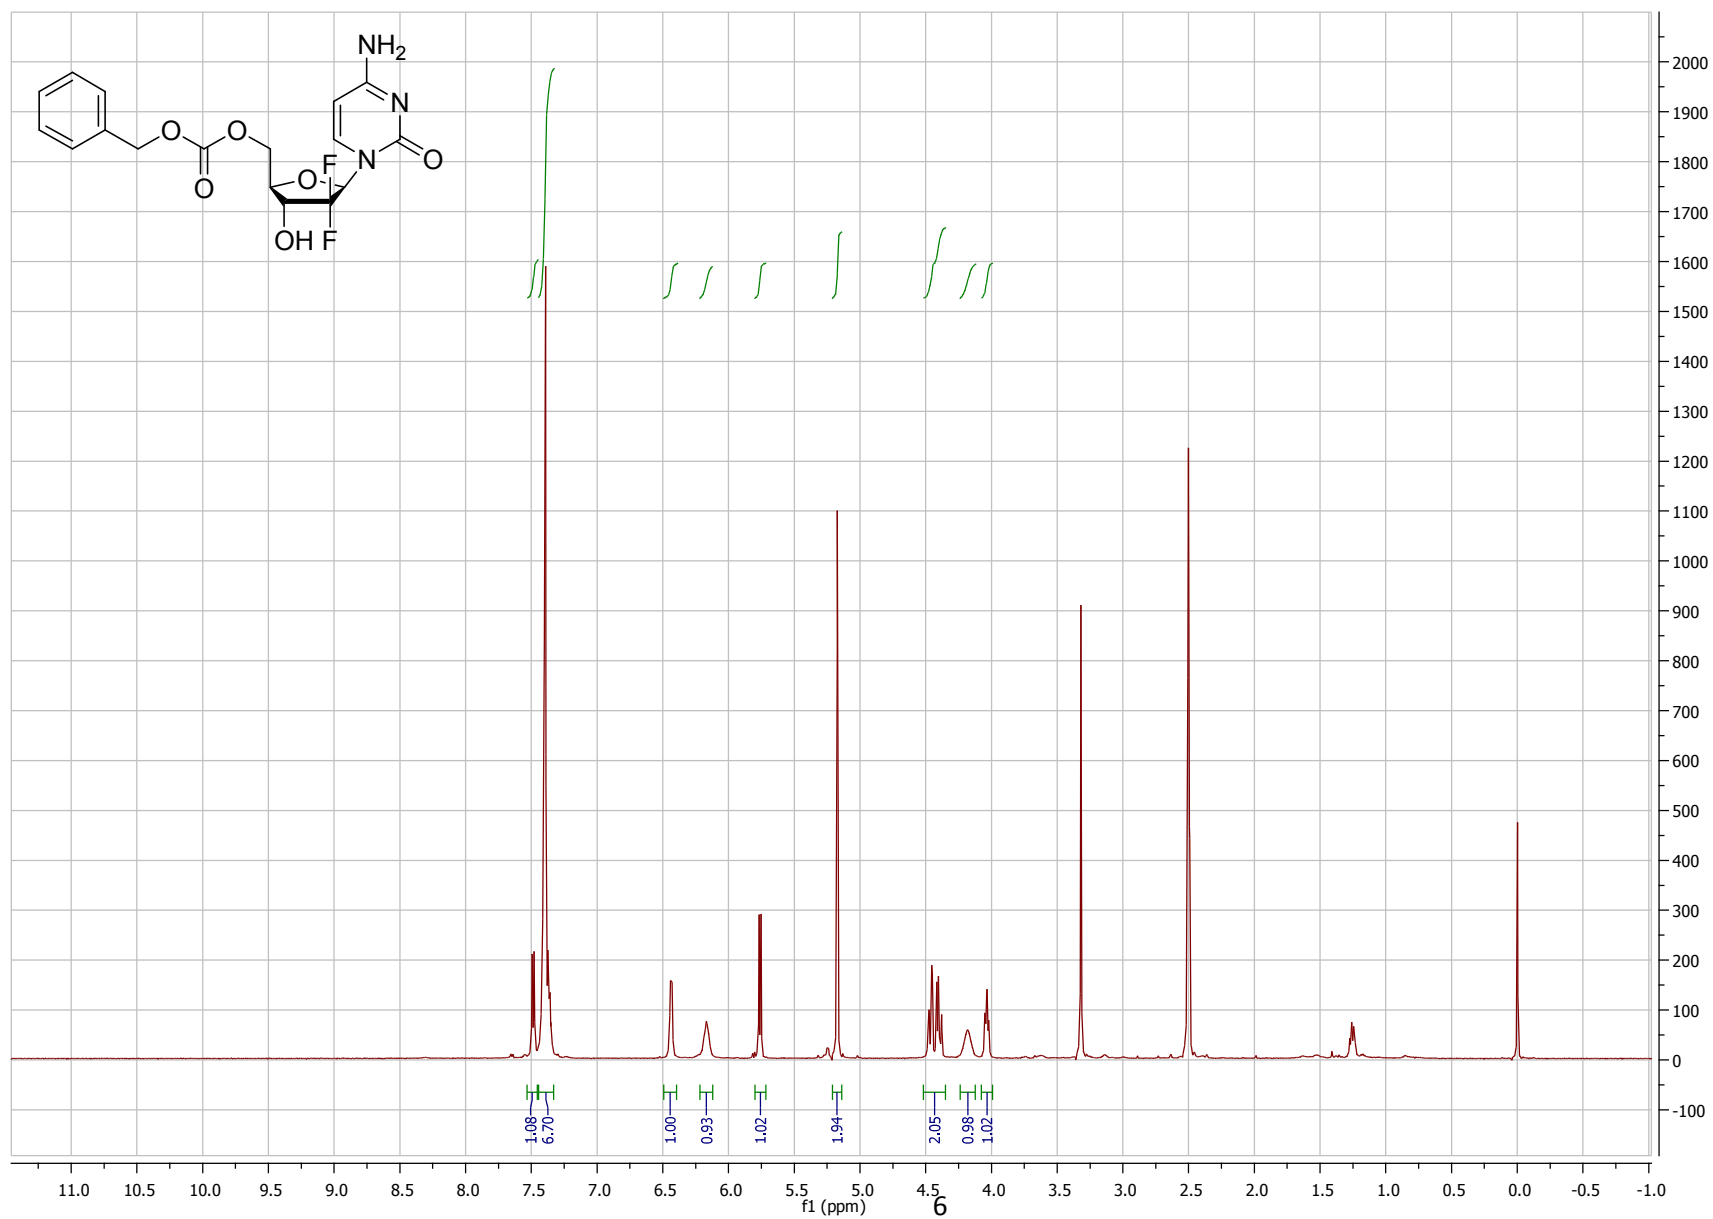

<sup>13</sup>C NMR (126 MHz, d-DMSO) of compound **2b**

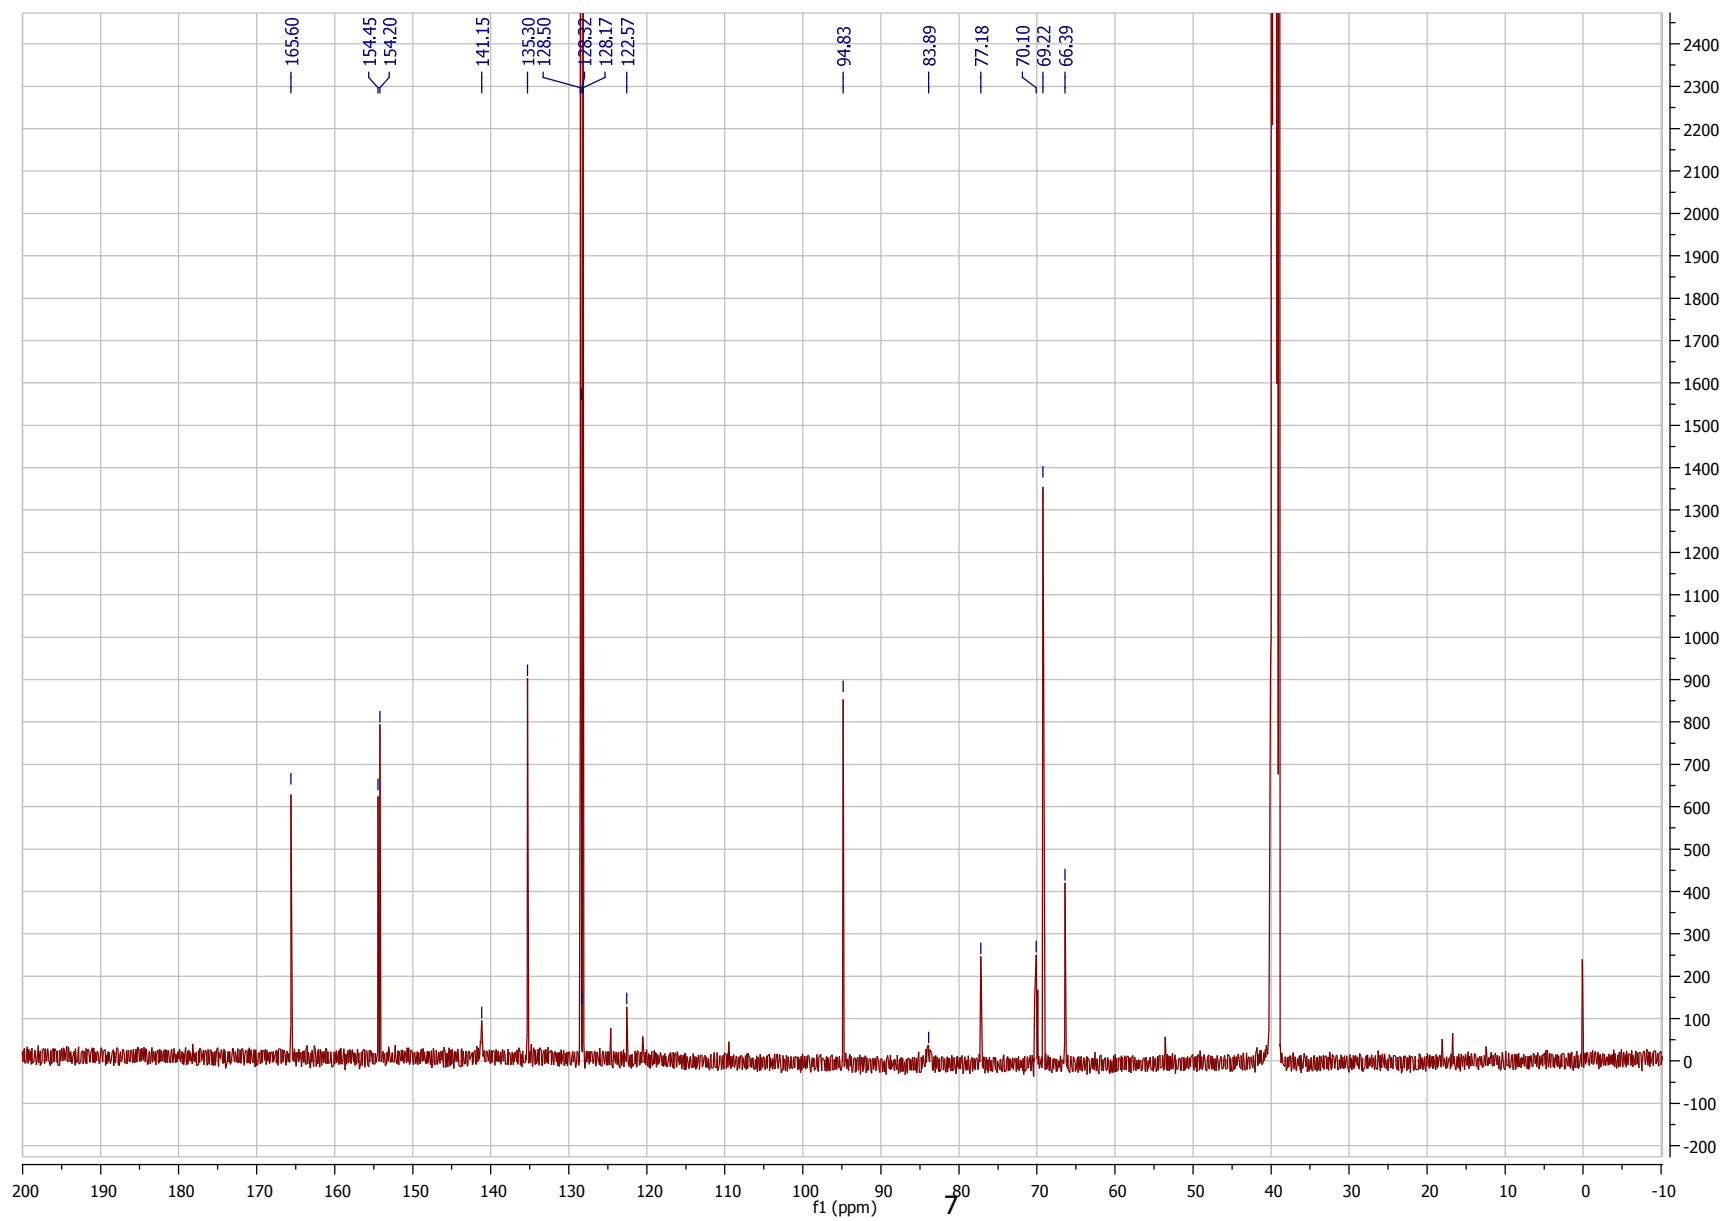

<sup>1</sup>H NMR (500 MHz, d-DMSO) of compound 5a

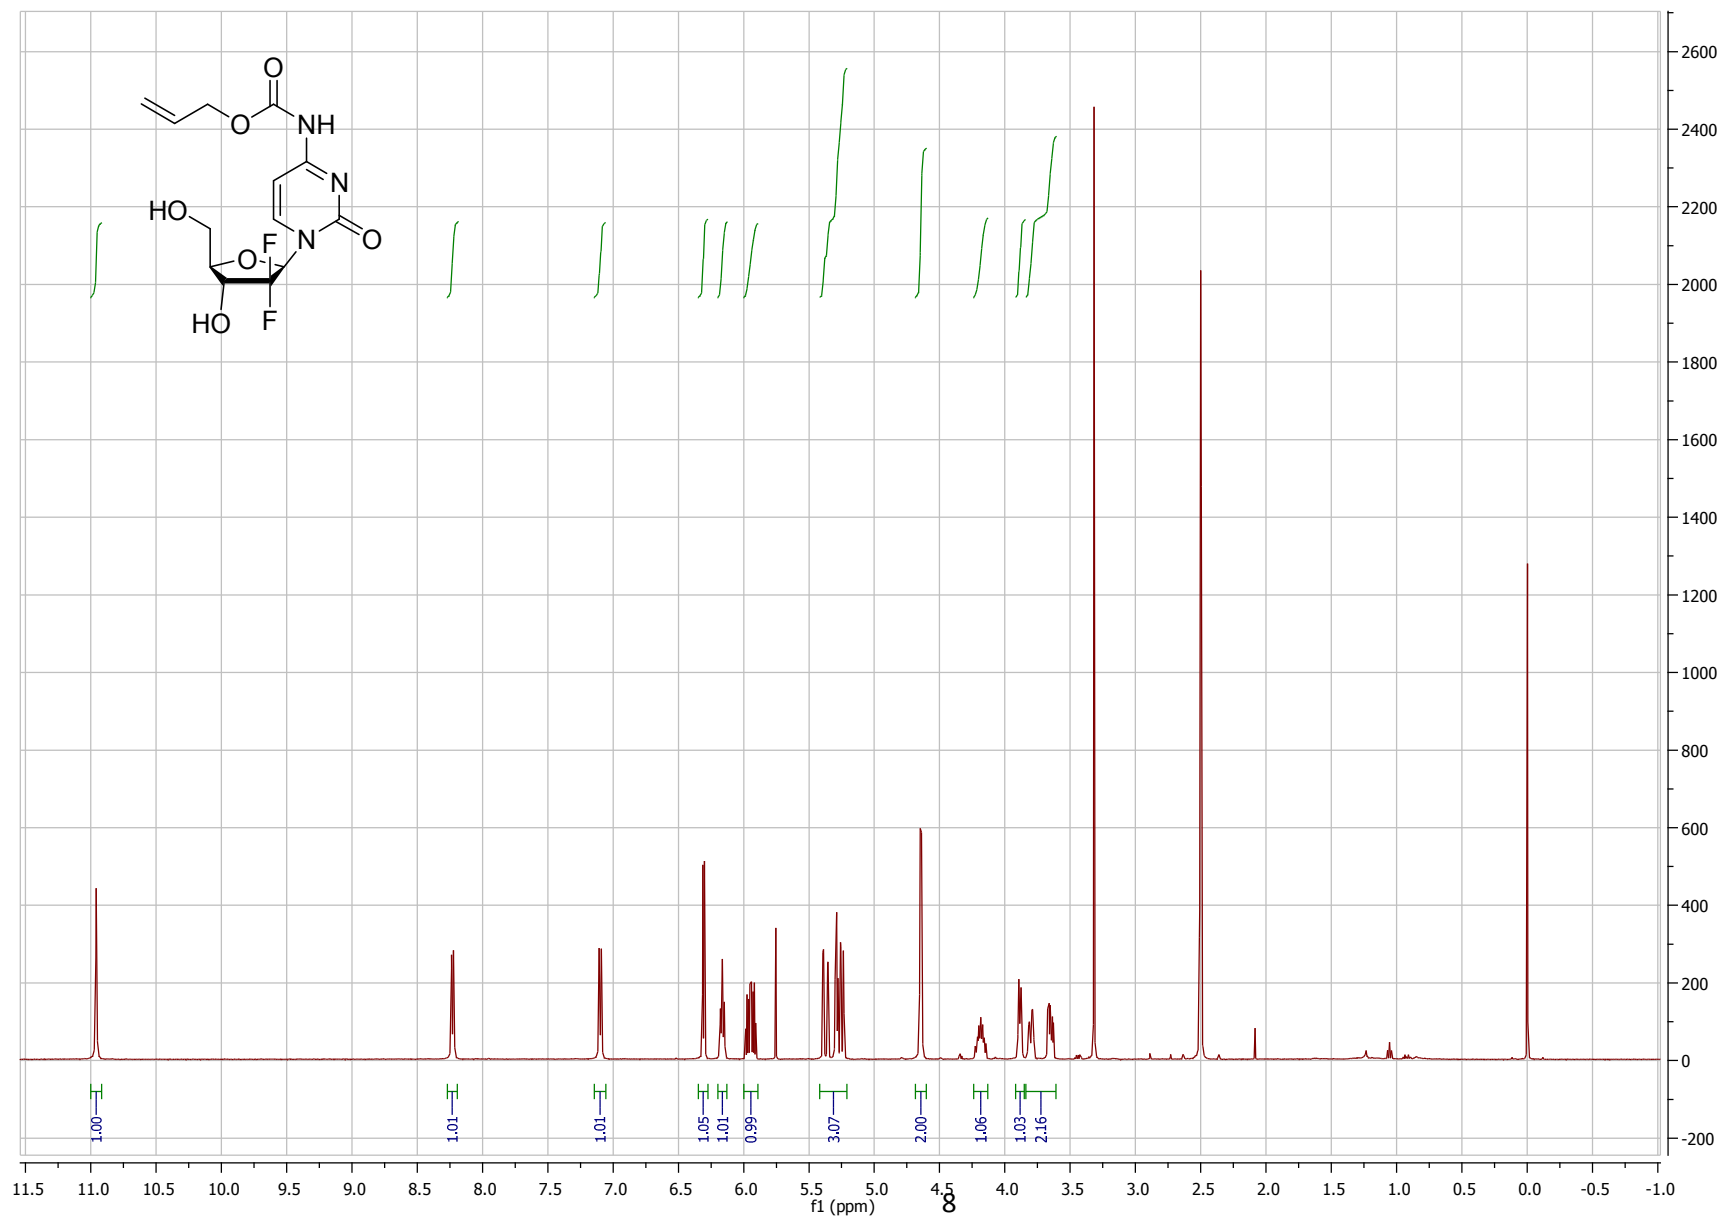



<sup>13</sup>C NMR (126 MHz, d-DMSO) of compound **5a**

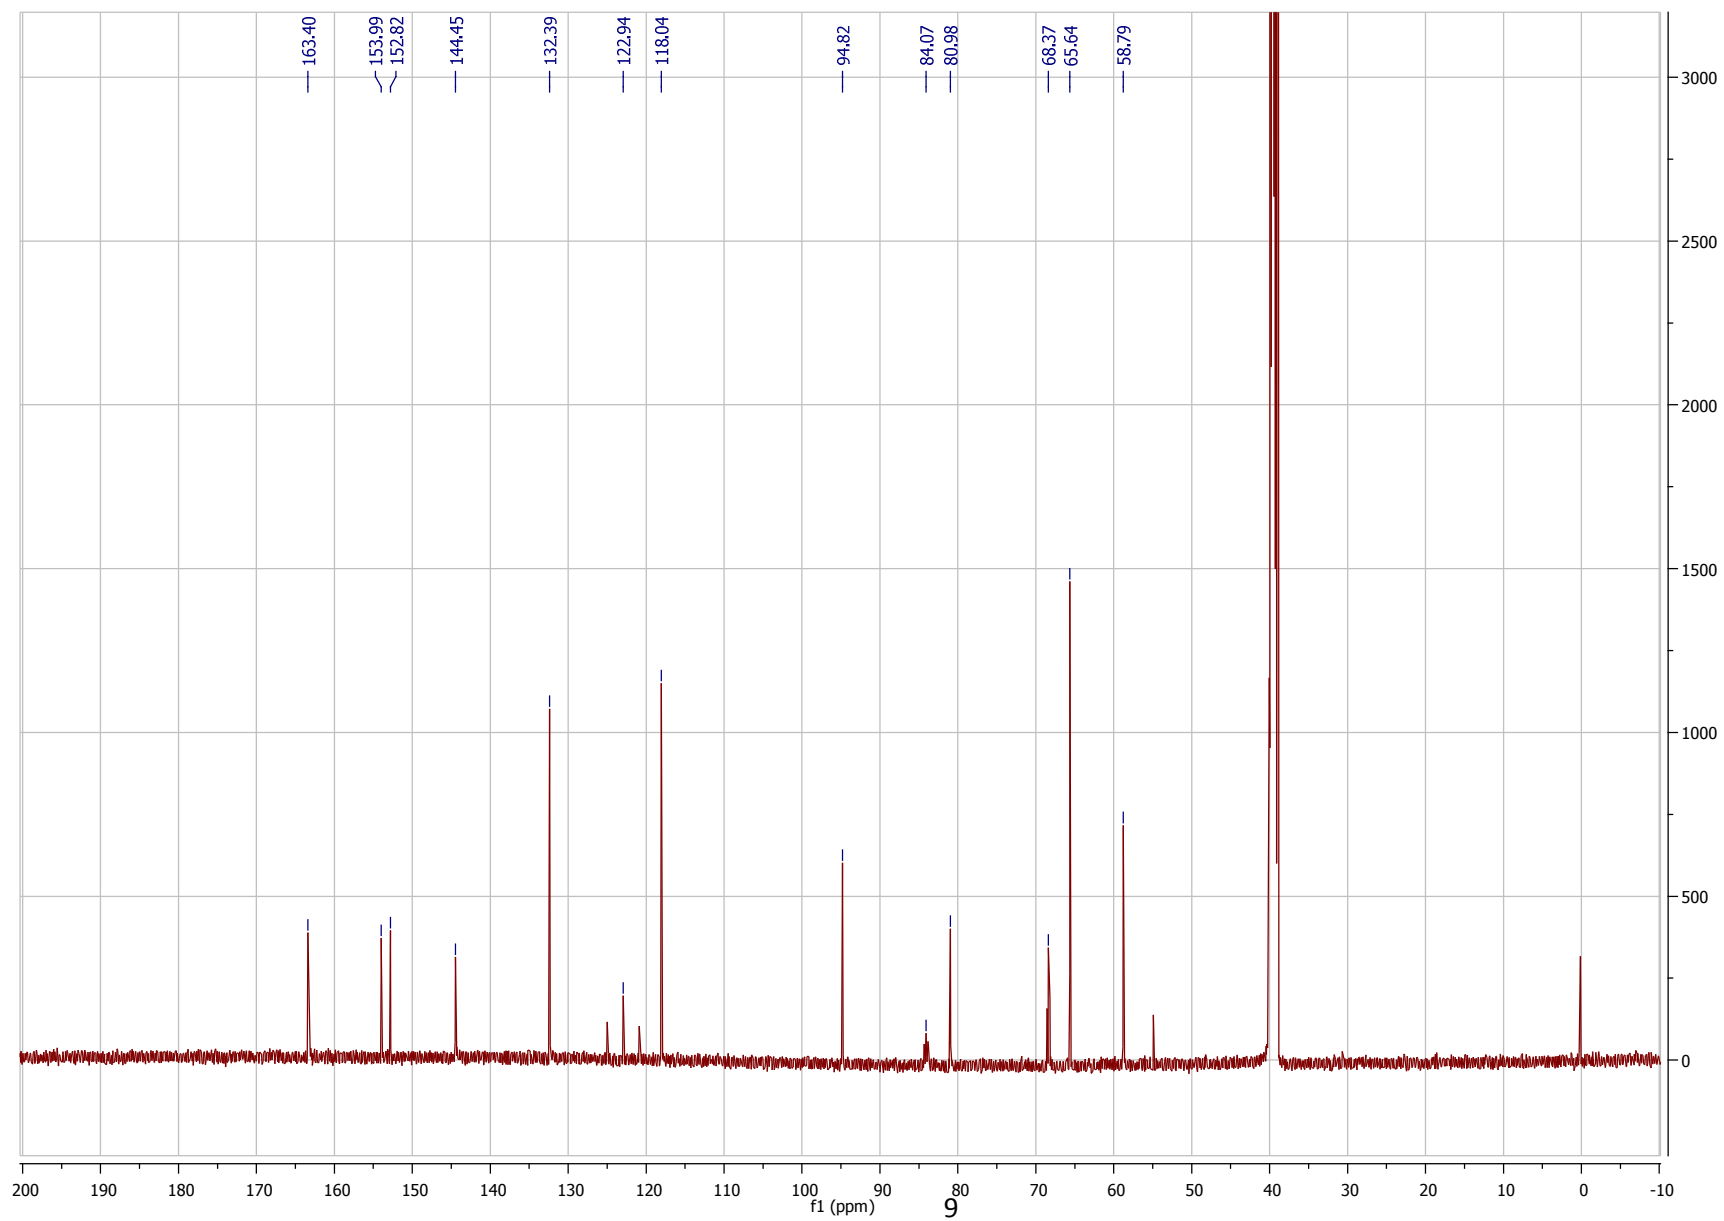

<sup>1</sup>H NMR (500 MHz, d-DMSO) of compound **5p**

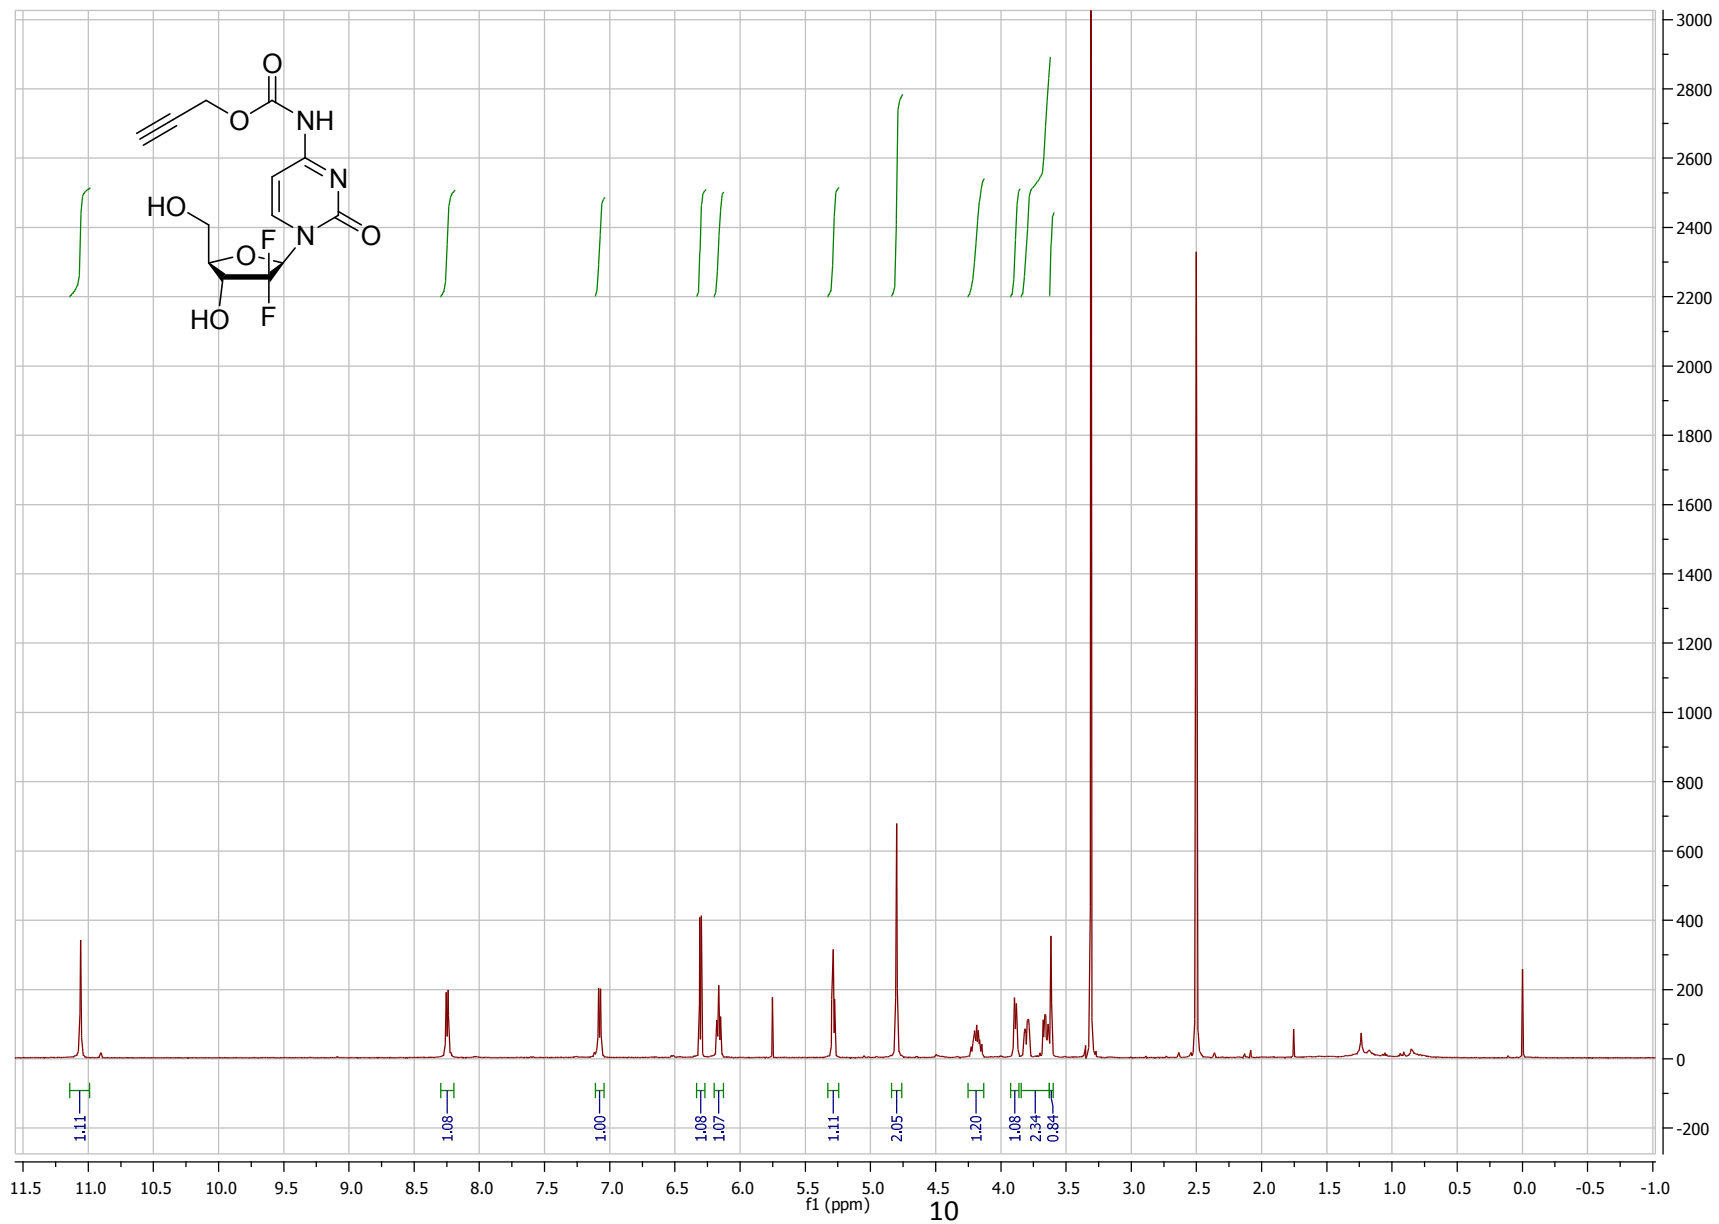

<sup>13</sup>C NMR (126 MHz, d-DMSO) of compound **5p**

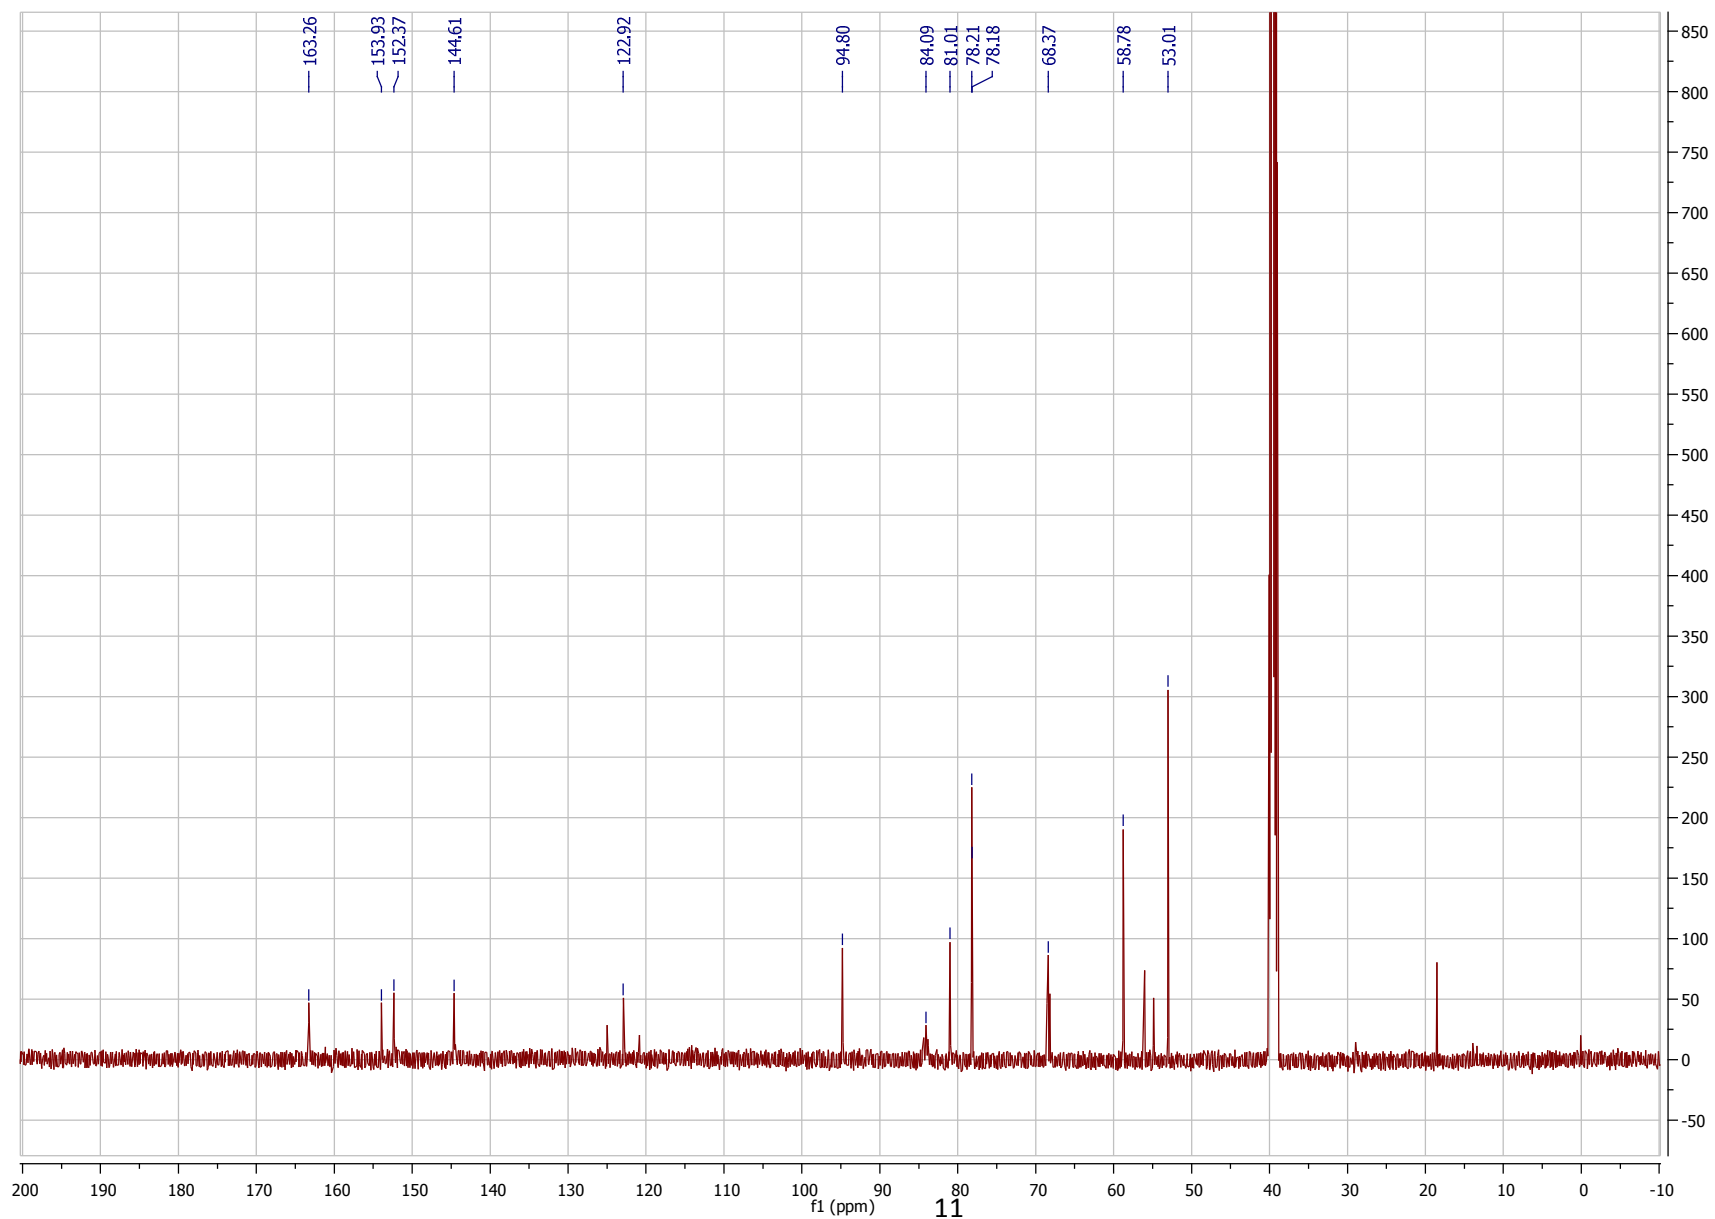

<sup>1</sup>H NMR (500 MHz, d-DMSO) of compound **5b**

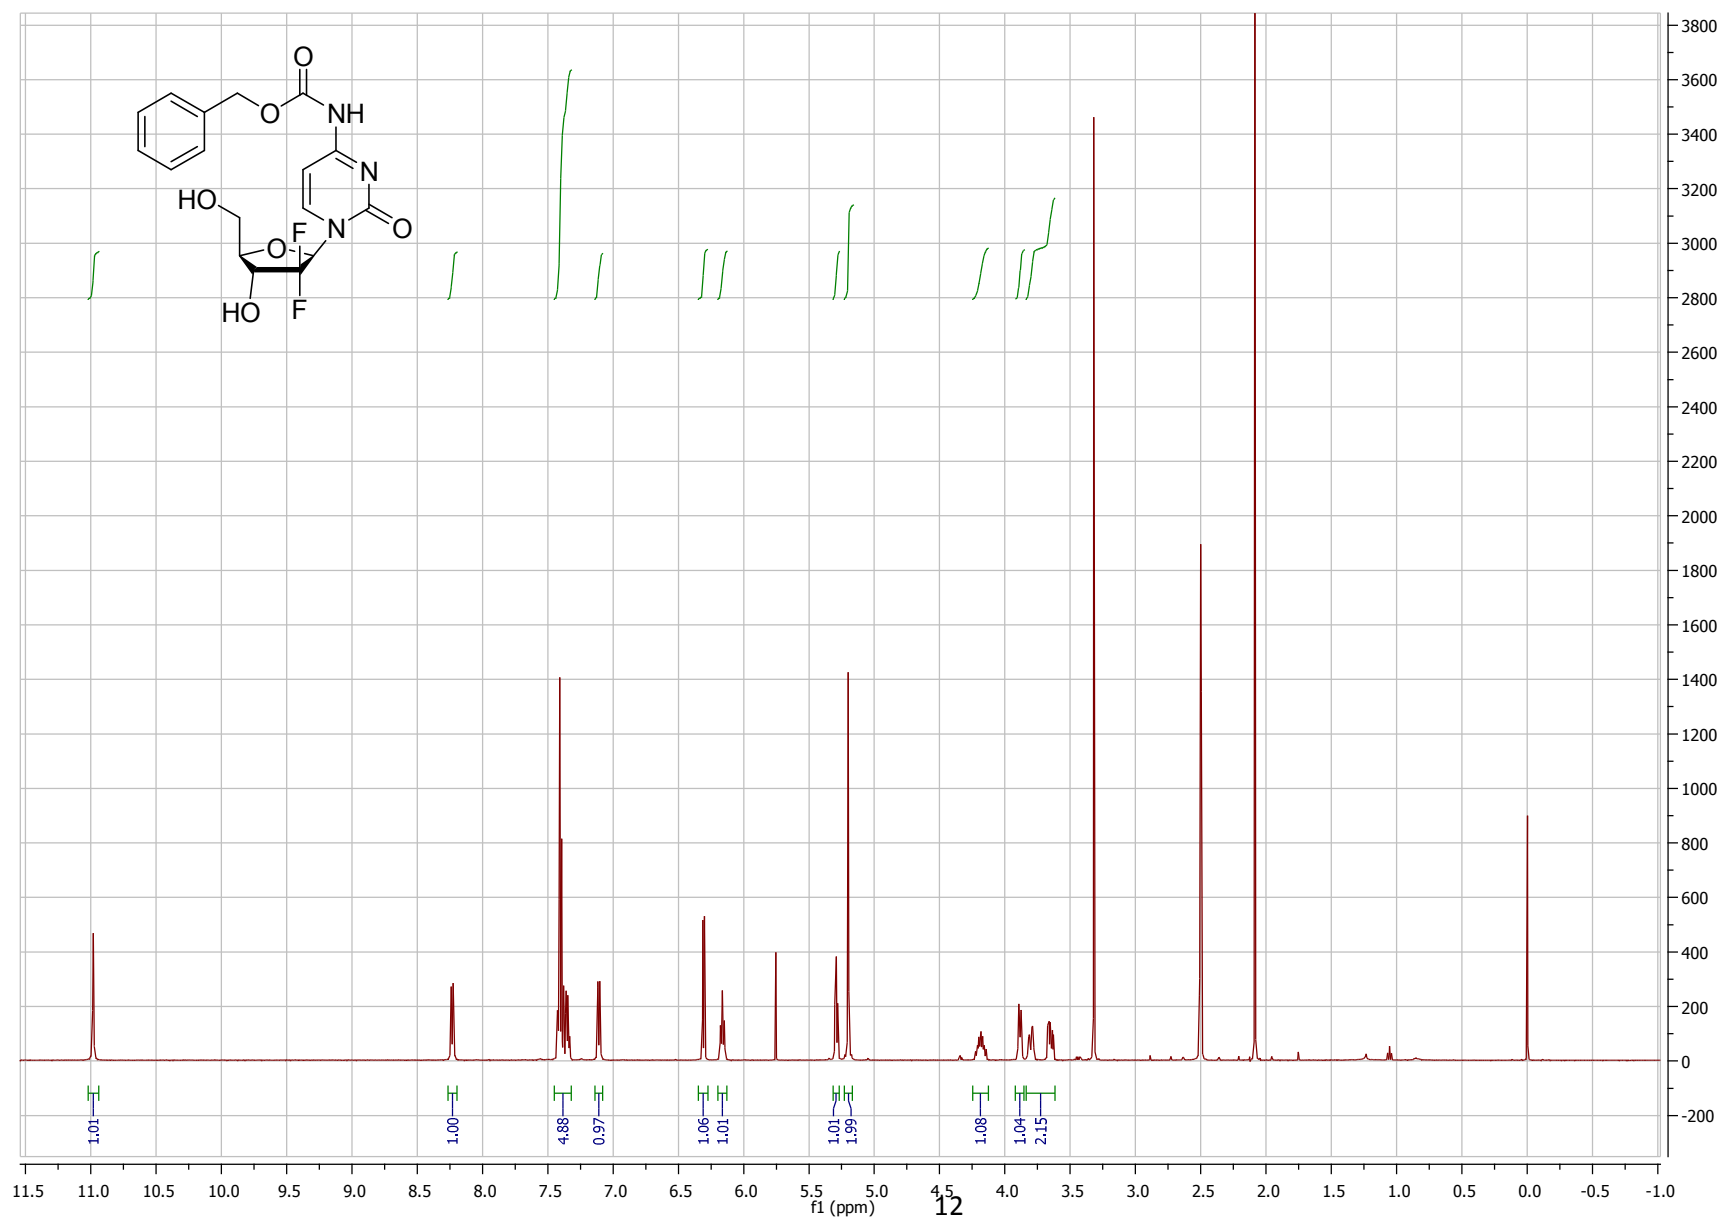

<sup>13</sup>C NMR (126 MHz, d-DMSO) of compound **5b**

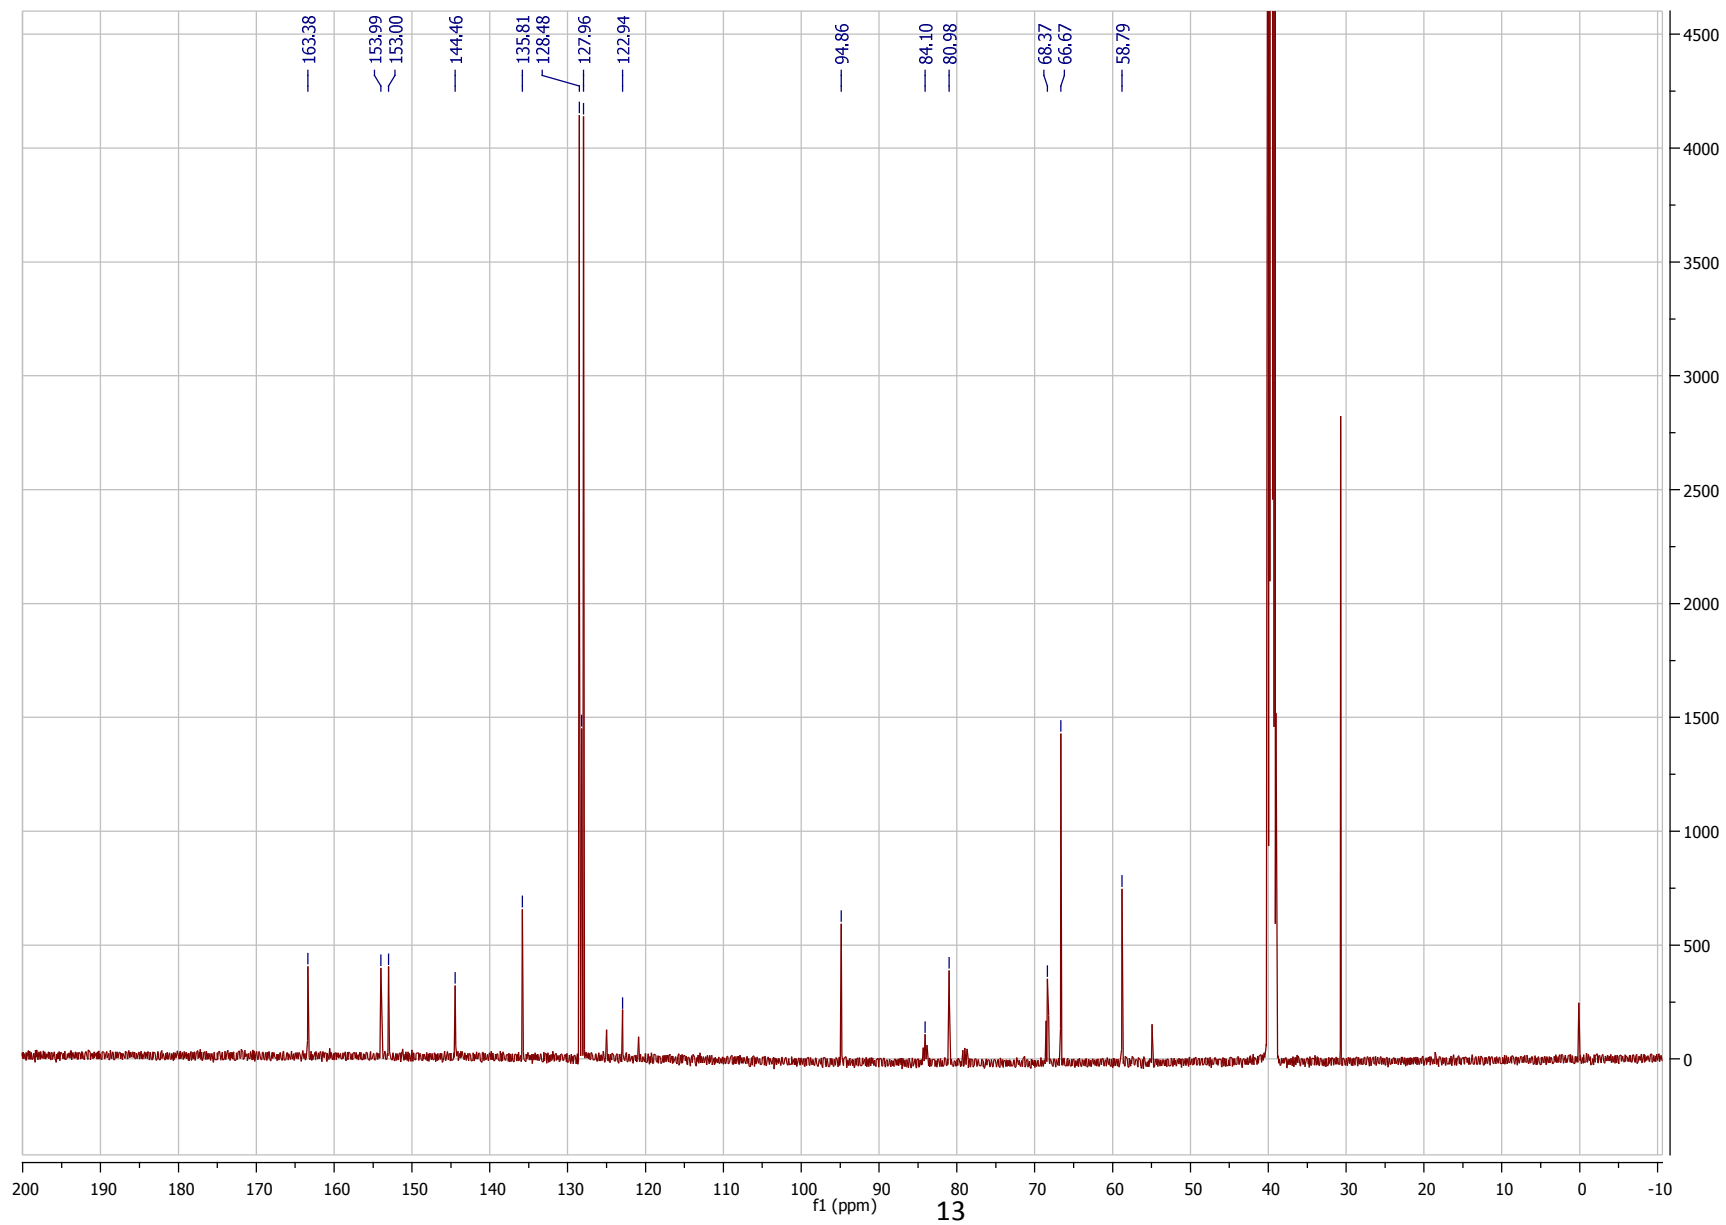

<sup>1</sup>H NMR (500 MHz, d-MeOD) of compound **8a**

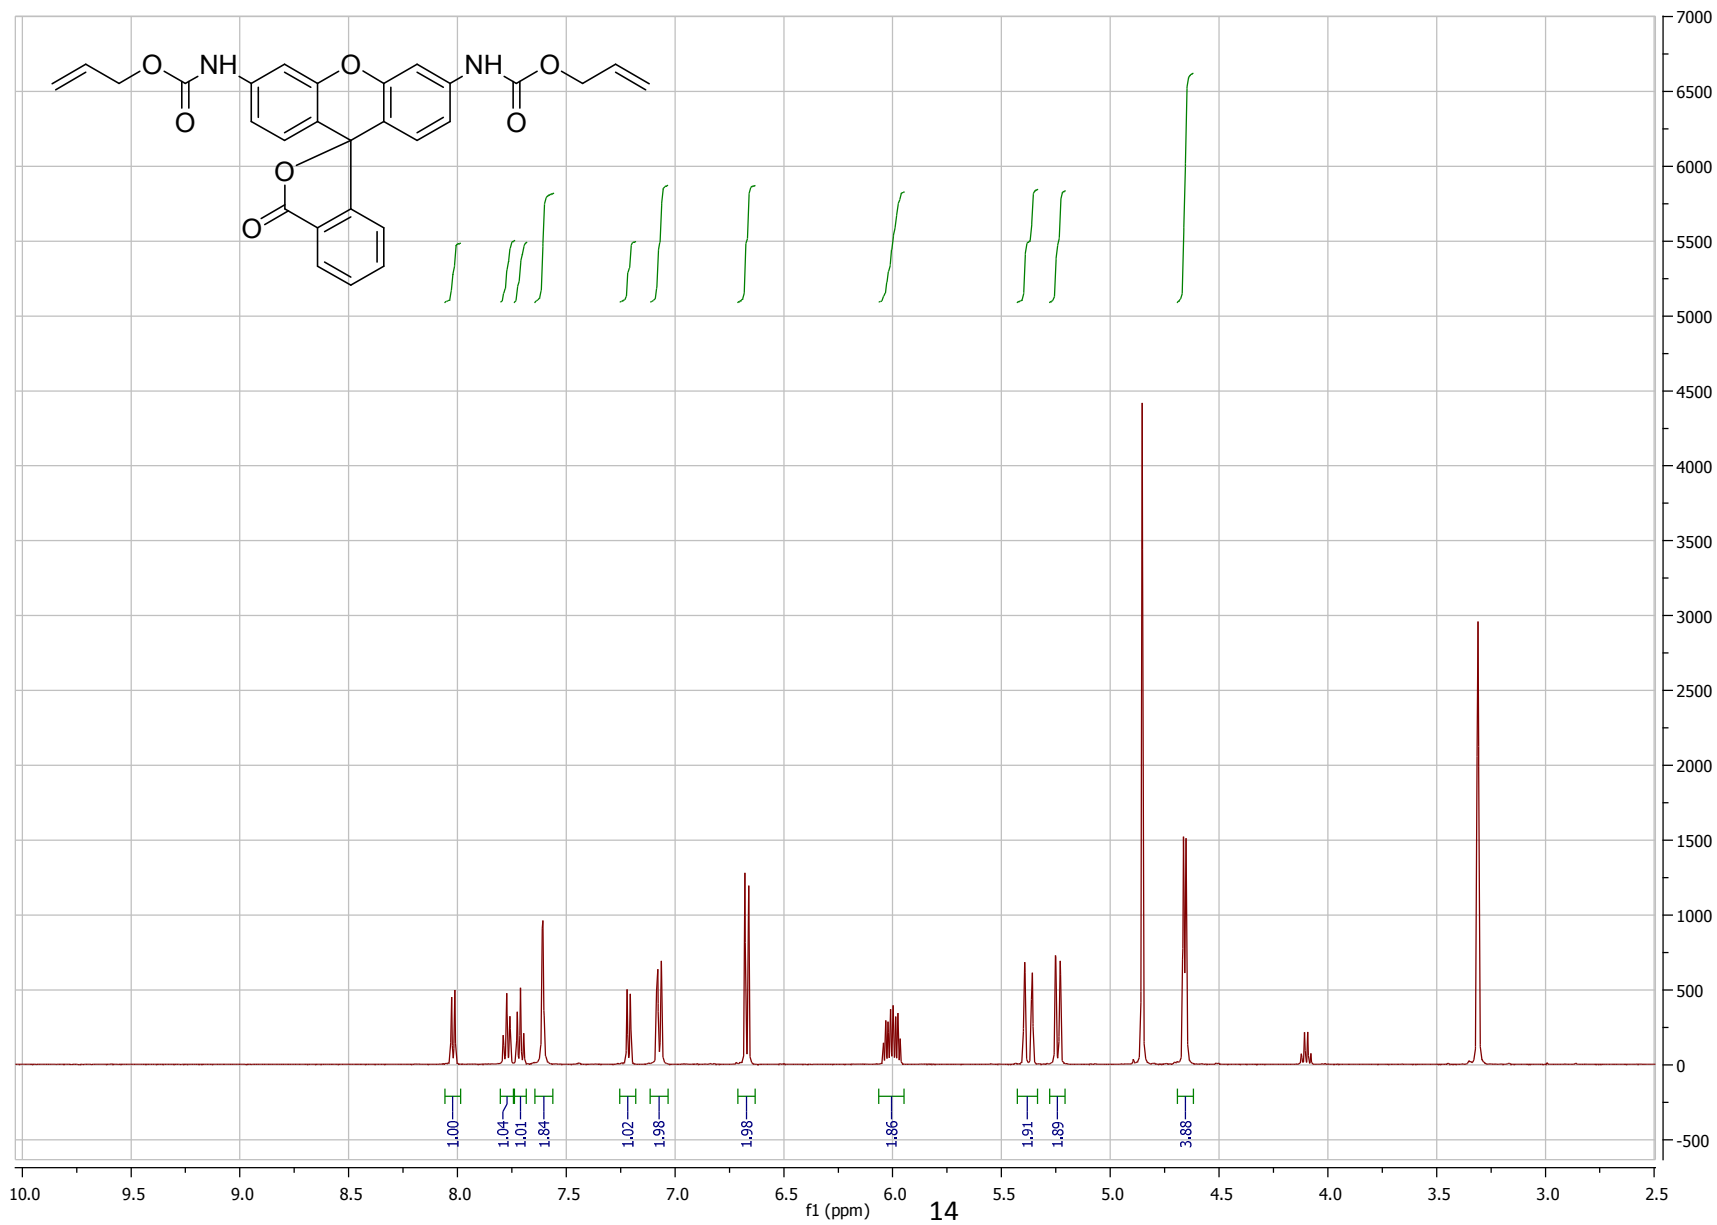

<sup>13</sup>C NMR (126 MHz, d-MeOD) of compound **8a**

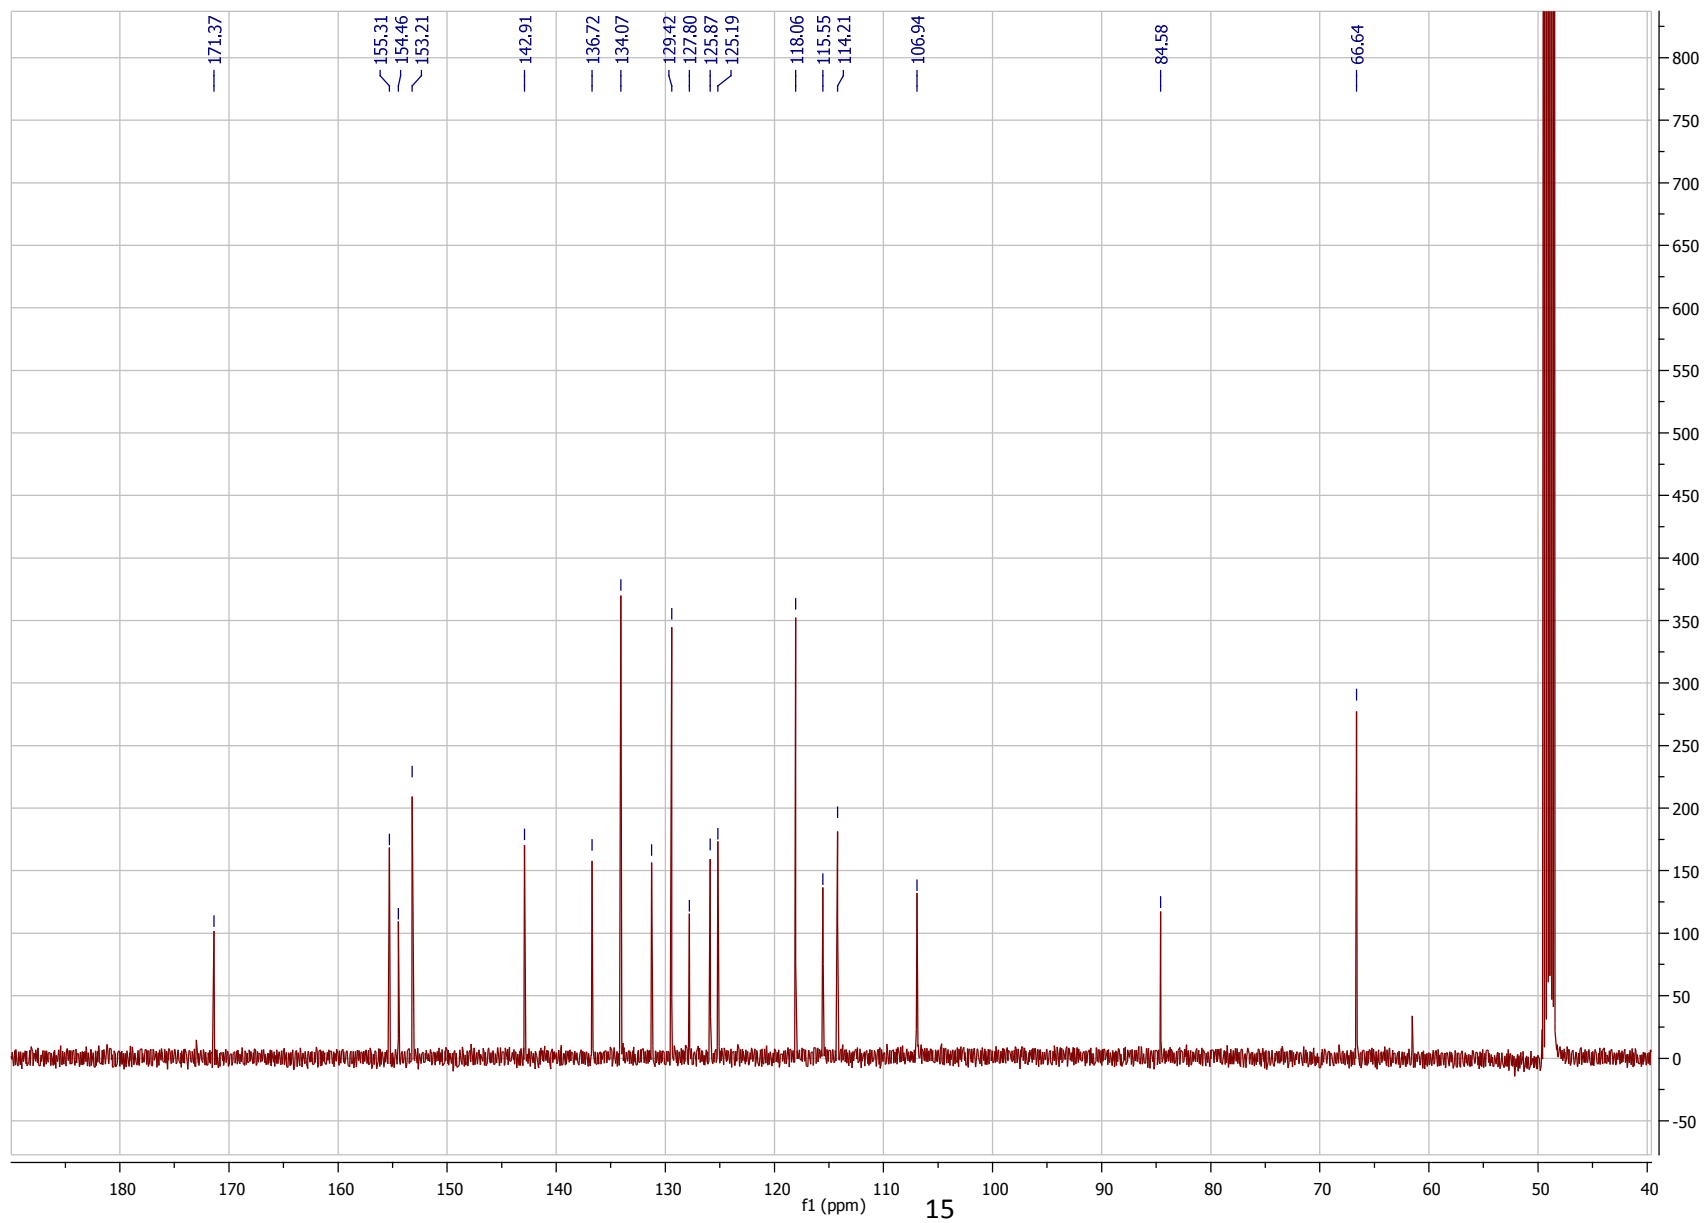

<sup>1</sup>H NMR (500 MHz, d-MeOD) of compound **8p**

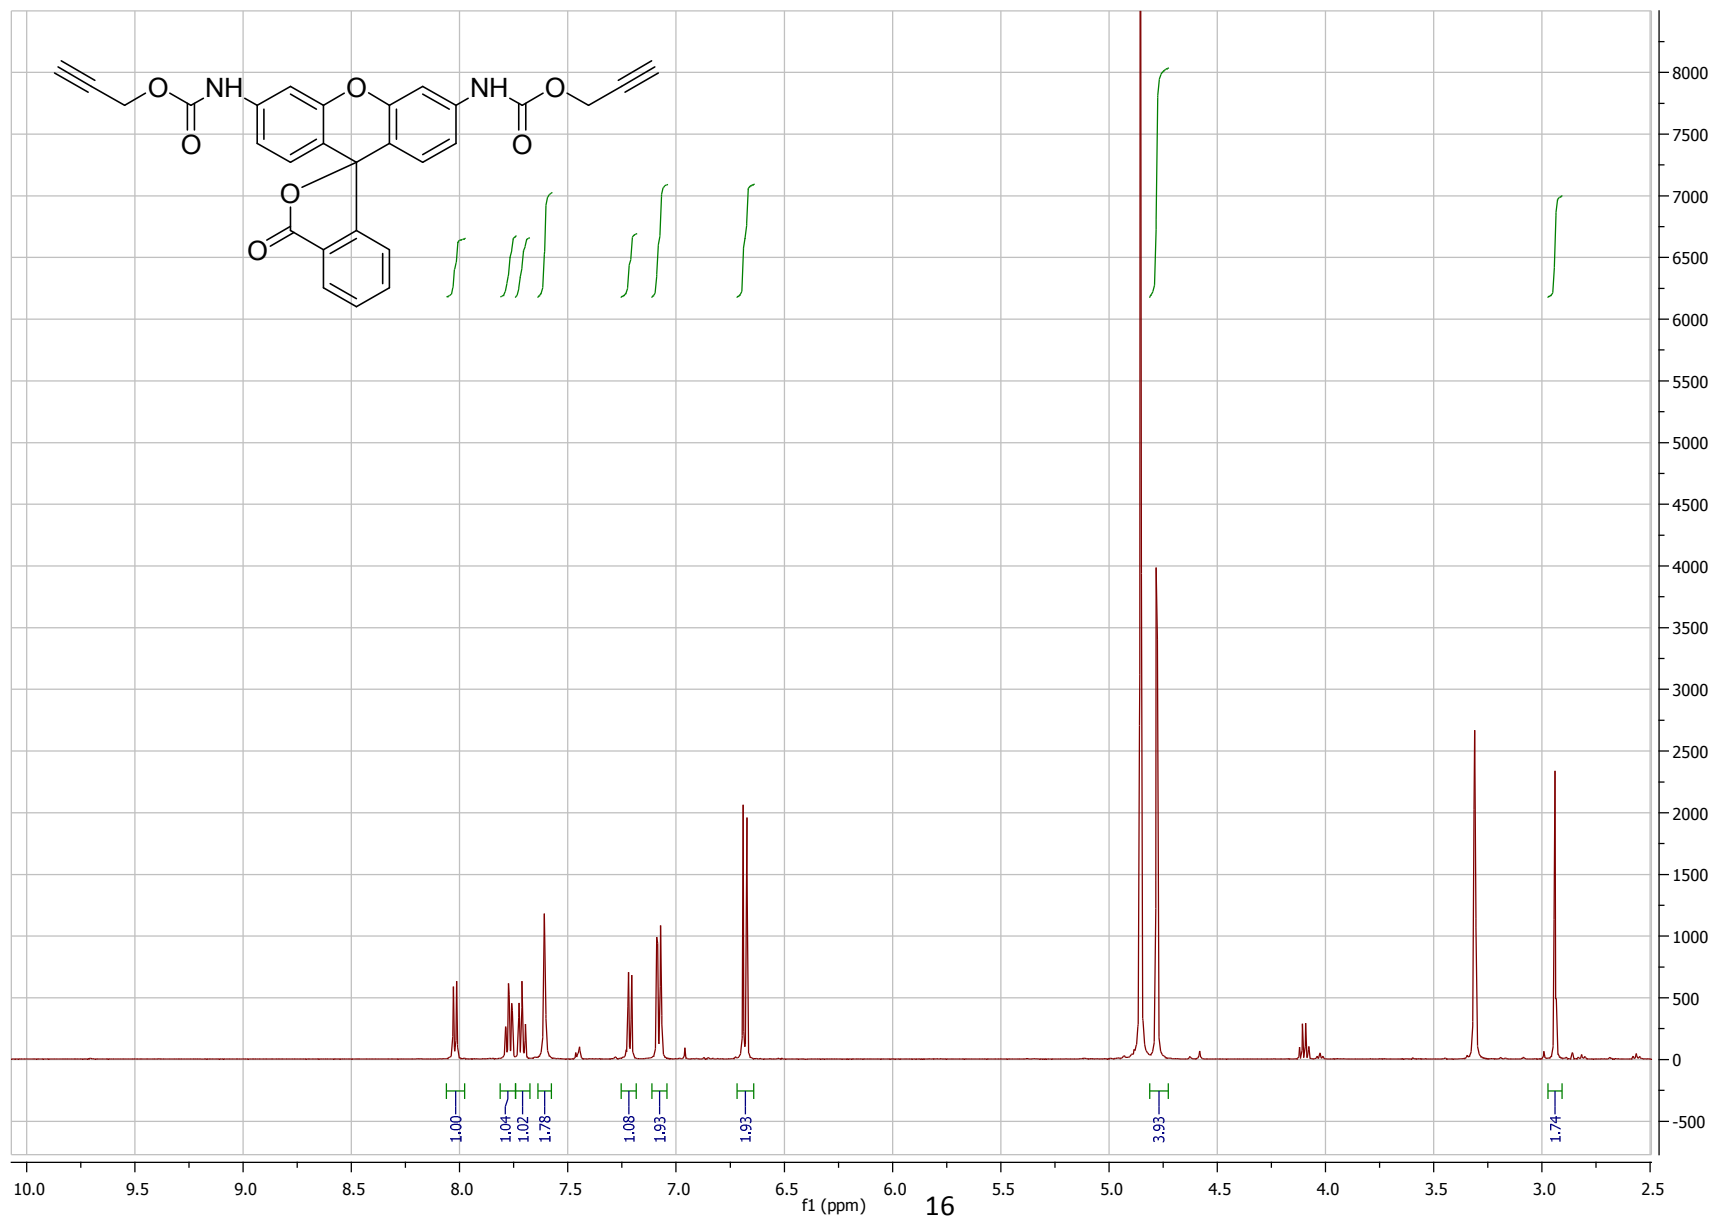



<sup>13</sup>C NMR (126 MHz, d-MeOD) of compound **8p**

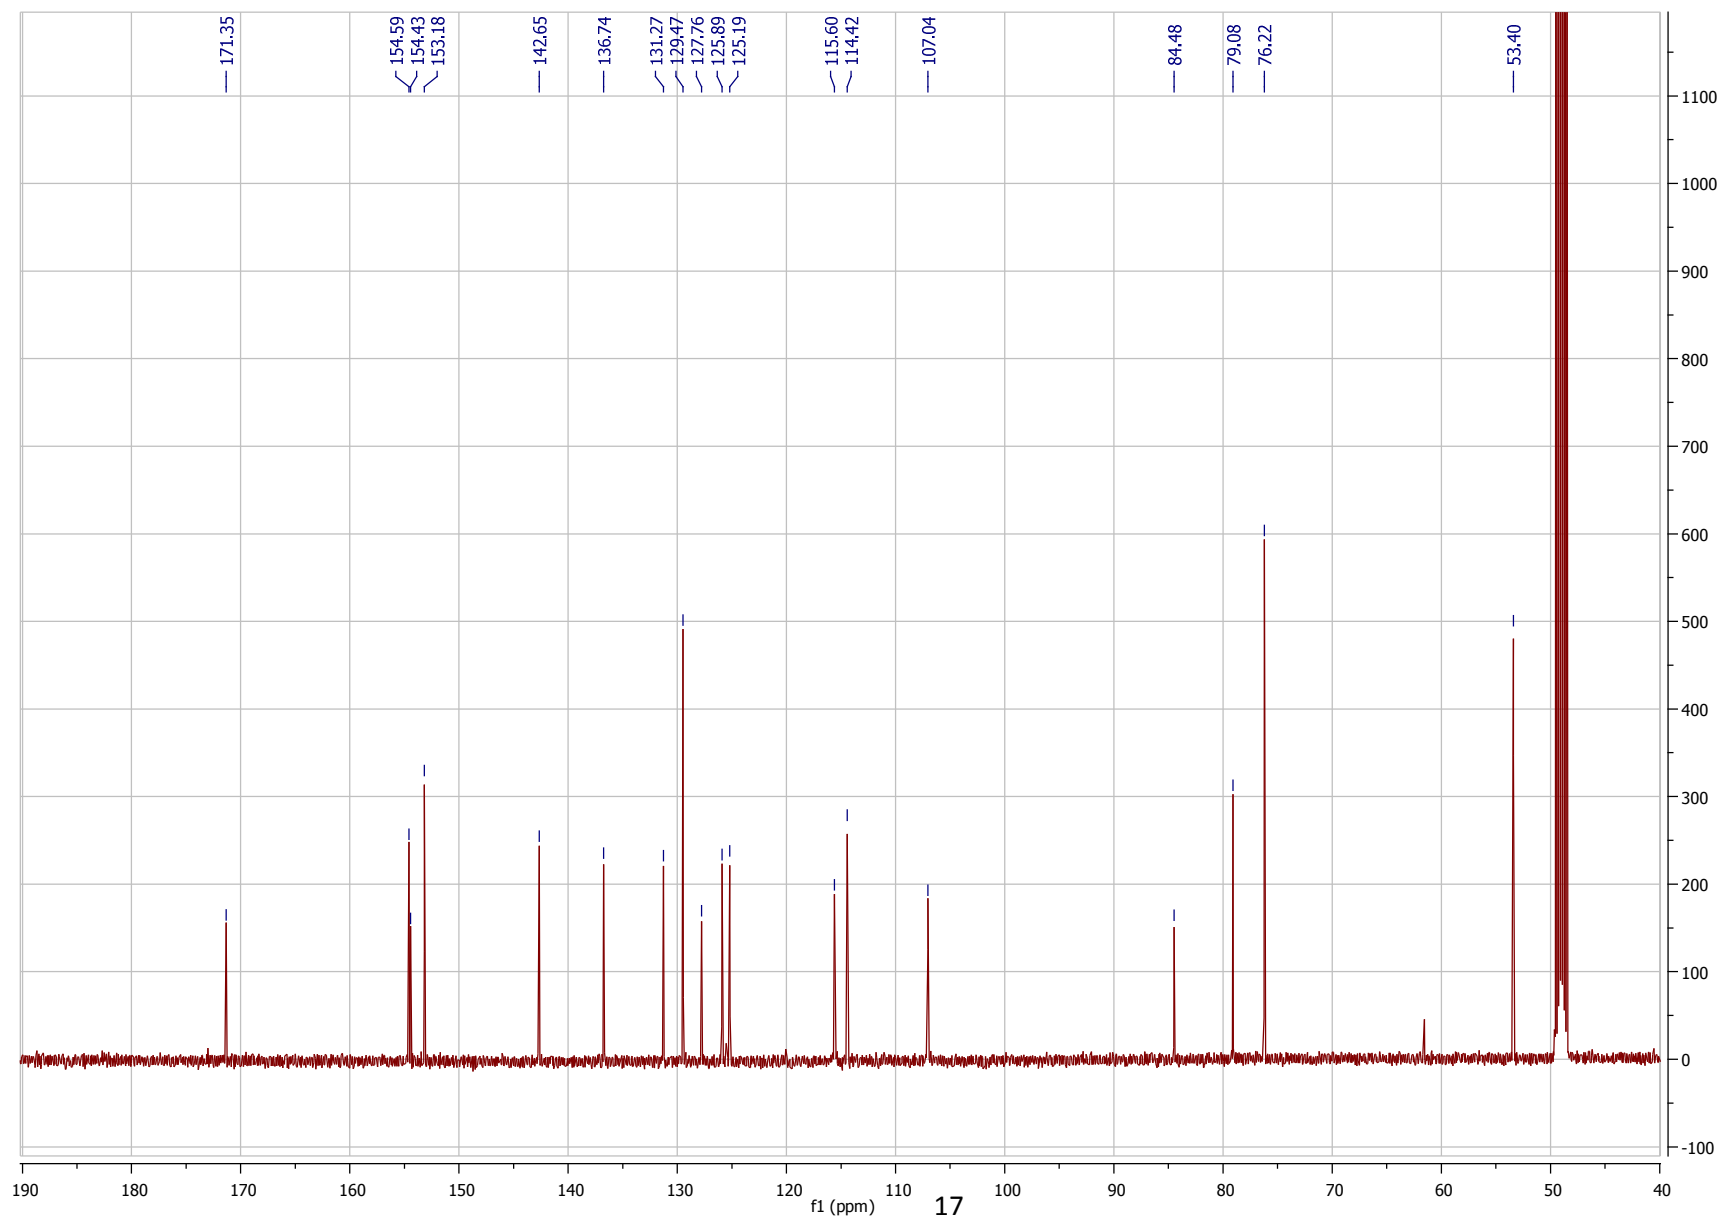

<sup>1</sup>H NMR (500 MHz, d-DMSO) of compound **8b**

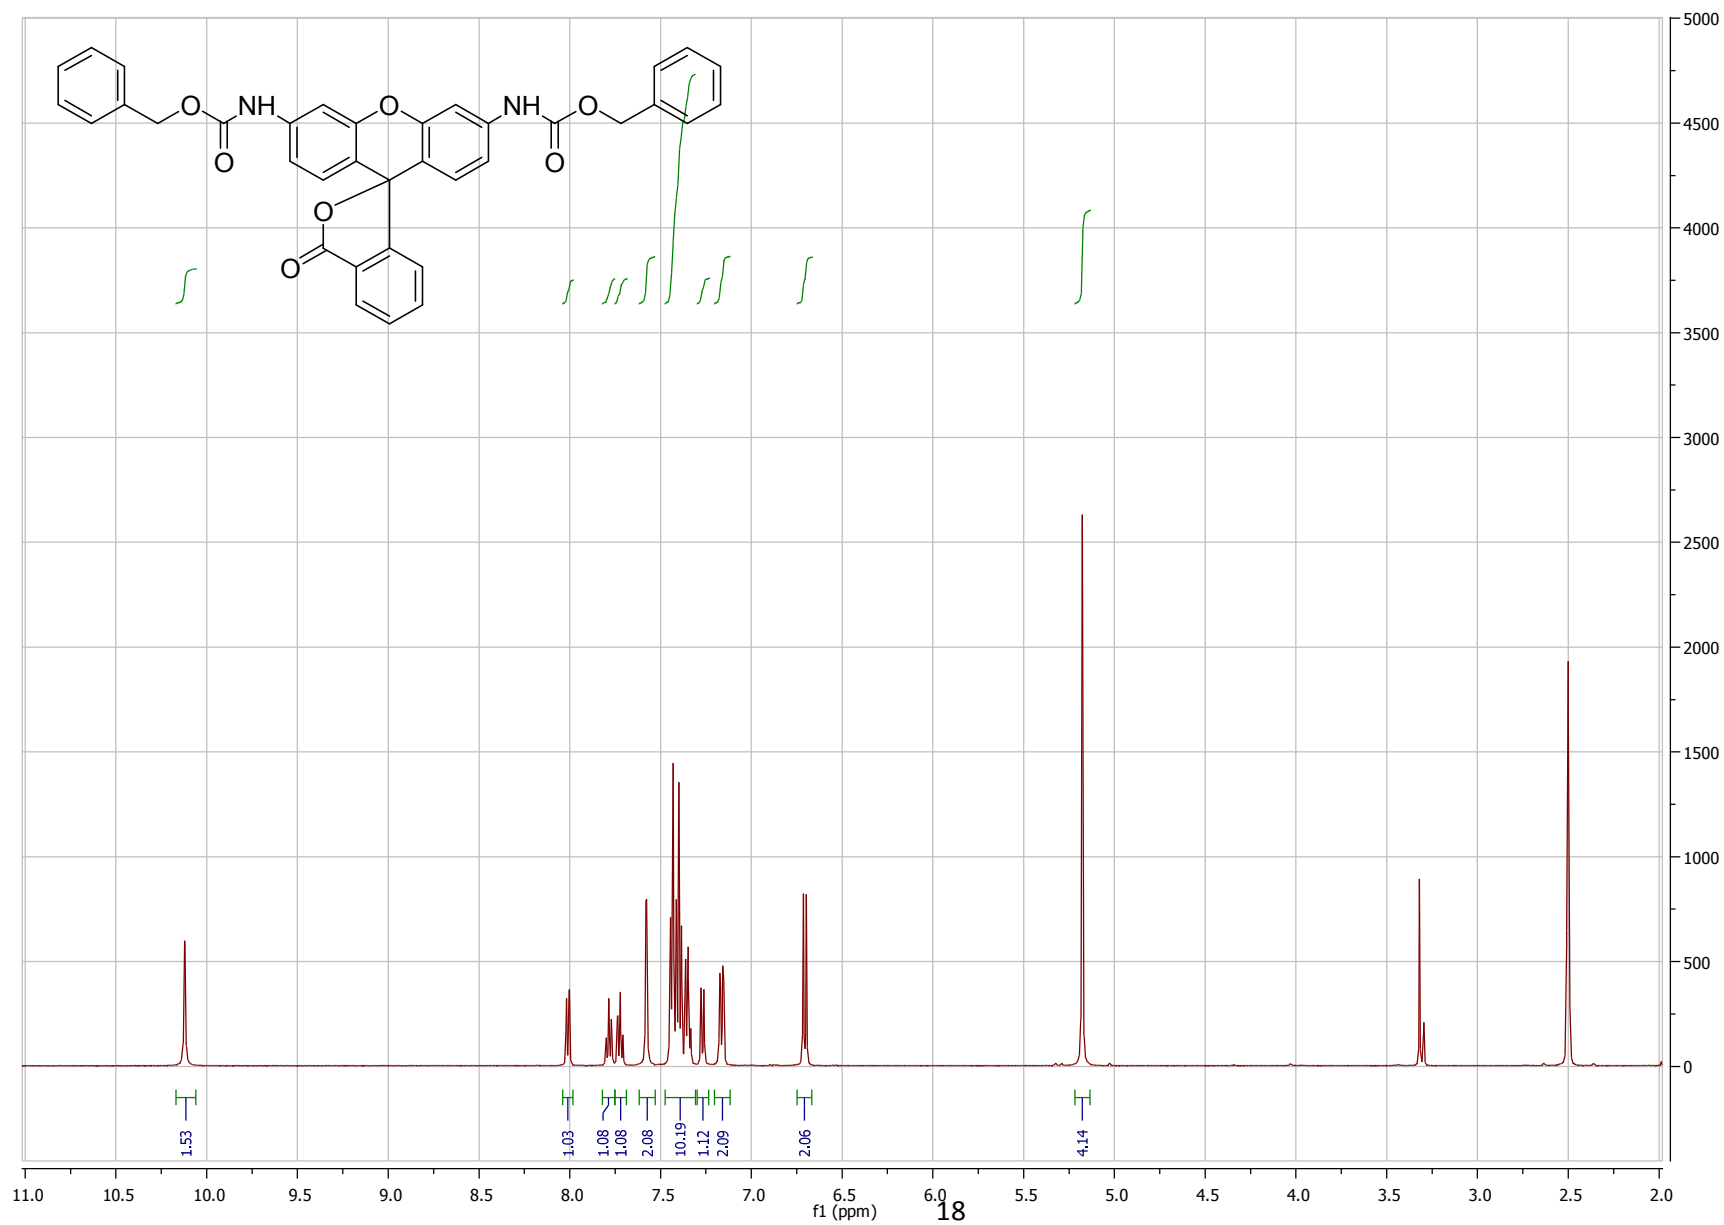

<sup>13</sup>C NMR (126 MHz, d-DMSO) of compound **8b**

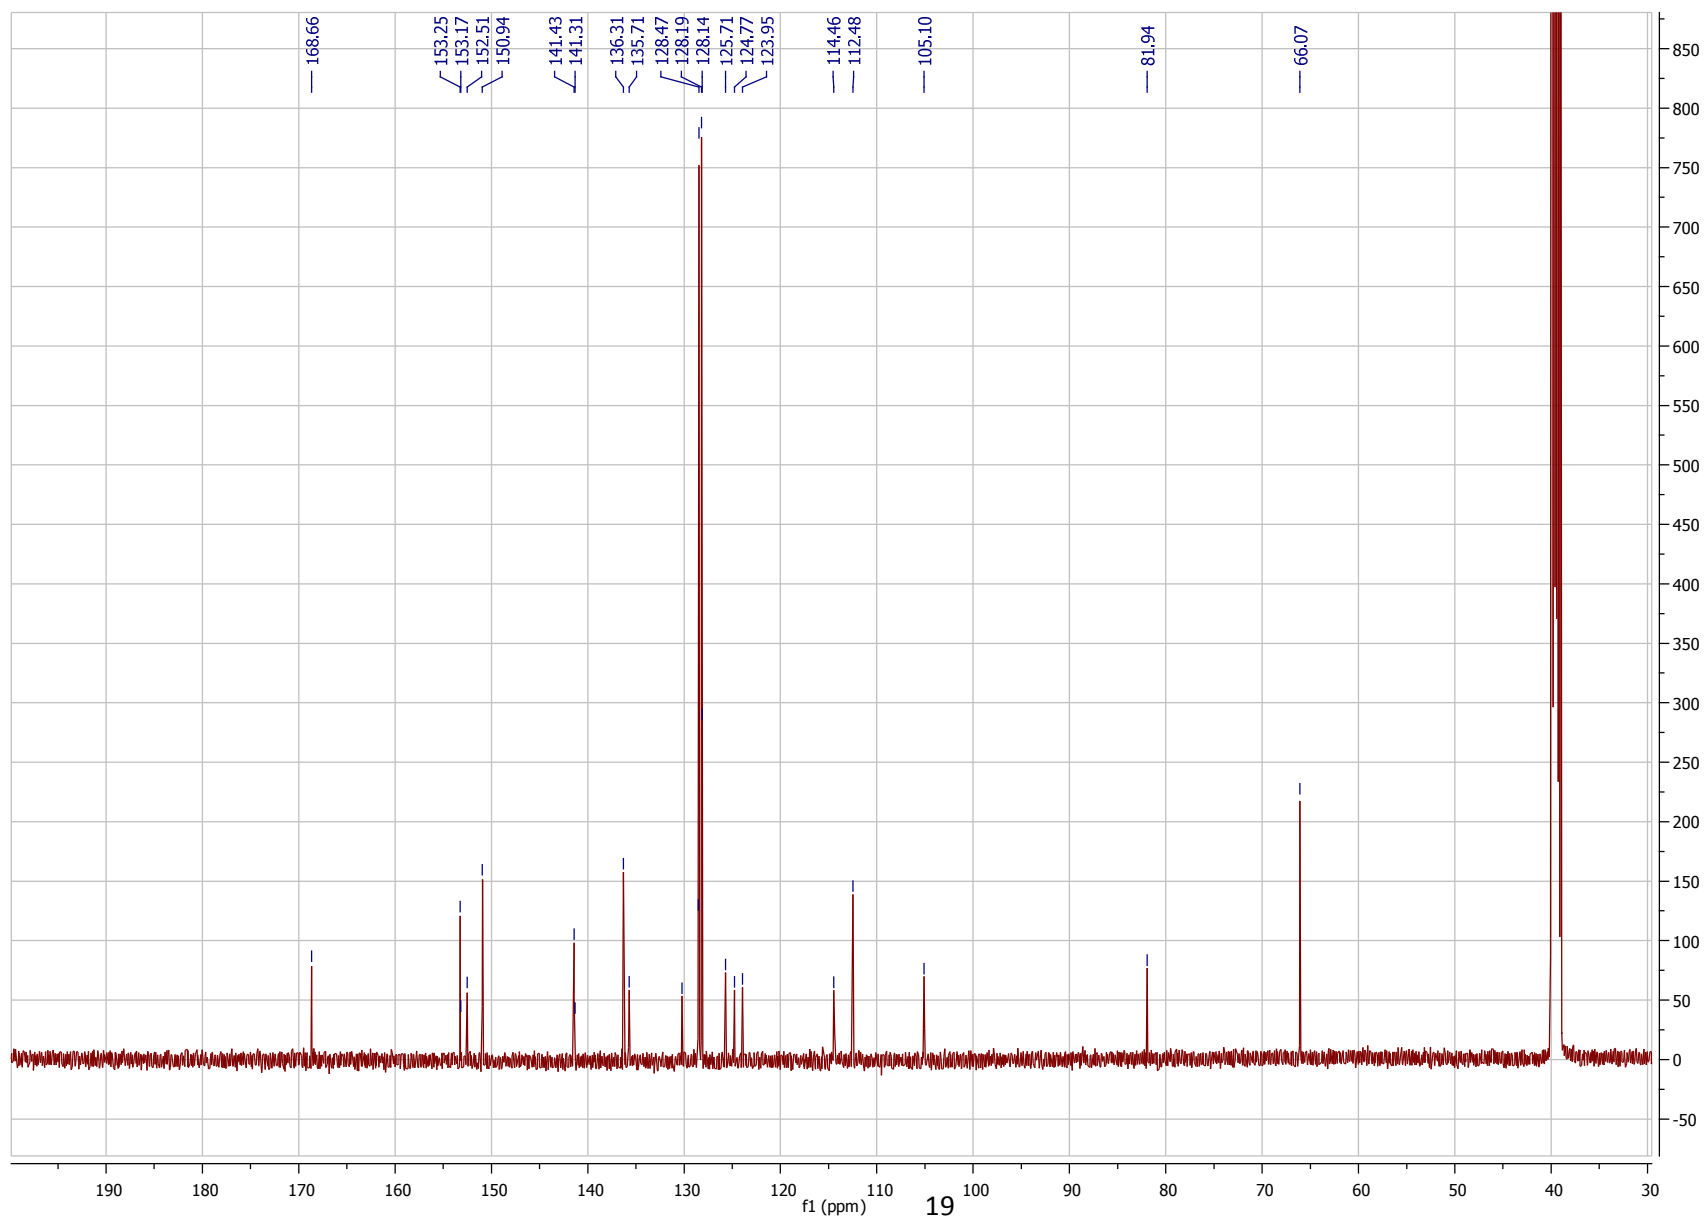

Supplement: jm500531z_si_001.pdf [file jm500531z_si_001.pdf]
